# Supplementary material for: Multiple miRNAs jointly regulate the biosynthesis of ecdysteroid in the holometabolous insects, Chilo suppressalis
Source: RNA. 2017 Dec;23(12):1817–33. doi: 10.1261/rna.061408.117 (PMC5689003; doi:10.1261/rna.061408.117)
Supplement: Supplemental Material [file supp_061408.117_Supplemental_Table_S2.xlsx]

## Sheet: conserved
Table S2-1 Discovery of 103 converved miRNAs in C. suppressalis
Family	miRNA name	Mature miRNA sequence	Length	Reads counts	Free energy	Loci	Precursor sequence
bantam	Csu-Bantam	UGAGAUCAUUGUGAAAGCU	19	3018	-17.1	scaffold209.len1057433+:440987-441039	UUUUCAUAAUGAUUUGACAGAUUGUUUUAUAUUCUGAGAUCAUUGUGAAAGCU
let-7	Csu-let-7	UGAGGUAGUAGGUUGUAUAG	20	64666	-26	scaffold24.len4360977-:3862222-3862289	UGAGGUAGUAGGUUGUAUAGUACUGUAAUACAACACUUUGGAGACACUGUACAGCCUGCUAACUUUCC
mir-1	Csu-miR-1a	UGGAAUGUAAAGAAGUAUGGAG	22	435008	-20.9	scaffold171.len1300579+:666824-666882	CCGUGCUUCCUUACUUCCCAUAGUGCUUAAAUUCGUAUGGAAUGUAAAGAAGUAUGGAG
mir-10	Csu-miR-10-3p	CAAAUUCGGUUCUAGAGAGGUUU	23	10857	-22.9	scaffold29.len3994842+:2173227-2173284	ACCCUGUAGAUCCGAAUUUGUUUGAAGUGAGGCGACAAAUUCGGUUCUAGAGAGGUUU
mir-10	Csu-miR-10-5p	UACCCUGUAGAUCCGAAUUUGU	22	4200	-36.4	scaffold29.len3994842+:2173214-2173295	GUGCCCUACAUCUACCCUGUAGAUCCGAAUUUGUUUGAAGUGAGGCGACAAAUUCGGUUCUAGAGAGGUUUGUGUGGUGCAU
mir-10	Csu-miR-993a-3p	GAAGCUCGUCUCUACAGGUAUC	22	319	-34.6	scaffold29.len3994842-:2280236-2280312	UCGUGAUCUACCCUGUAGAUCCGGGCUUUUGUAGUUUUAGUUCUCAUCAGAAGCUCGUCUCUACAGGUAUCUCACGG
mir-10	Csu-miR-993a-5p	UACCCUGUAGAUCCGGGCUUUU	22	529	-27.5	scaffold29.len3994842-:2280242-2280304	UACCCUGUAGAUCCGGGCUUUUGUAGUUUUAGUUCUCAUCAGAAGCUCGUCUCUACAGGUAUC
mir-11	Csu-miR-11	CAUCACAGUCAGAGUUCUAGCU	22	1125	-19.6	scaffold116.len1819713+:1101323-1101374	CACUCCGGCUGUGACUUGUGUCCAUUUUCACAUCACAGUCAGAGUUCUAGCU
mir-1175	Csu-miR-1175-3p	UGAGAUUCAACUCCUCCAACUU	22	12	-35.7	scaffold17.len4986324+:180573-180686	GCAGAAGUUGAAAAAGUAGCGUUAAGGAUUAAGUGGAGGUGUGAUCUCUUCACUUUUUAUGCCUAAAGUGAGAUUCAACUCCUCCAACUUAACCCUGAACCGCAUUUUCAUCGC
mir-1175	Csu-miR-1175-5p	AAGUGGAGGUGUGAUCUCUU	20	55	-35.7	scaffold17.len4986324+:180573-180686	GCAGAAGUUGAAAAAGUAGCGUUAAGGAUUAAGUGGAGGUGUGAUCUCUUCACUUUUUAUGCCUAAAGUGAGAUUCAACUCCUCCAACUUAACCCUGAACCGCAUUUUCAUCGC
mir-124	Csu-miR-124	UAAGGCACGCGGUGAAUG	18	59	-37.9	scaffold77.len2536142-:344857-344968	UUUAAUGAAGAAGUCAGUCCUACUCCUCGCGUUCACUGCCGGCGUCUUUAUGUGUUGUGAUCCAUCAUAAGGCACGCGGUGAAUGCCAAGAGCGGACUAAAGCGUCGUUGAG
mir-133	Csu-miR-133	UUGGUCCCCUUCAACCAGCU	20	10	-18.6	scaffold171.len1300579+:718753-718809	CUGGUUGACUUCGGGUCAAAUUGUCAUUUUAUAUCAUUUGGUCCCCUUCAACCAGCU
mir-137	Csu-miR-137	UAUUGCUUGAGAAUACACG	19	1	-17.95	scaffold232.len900487+:545652-545704	ACUGAAGAAUGACCUUAUUGCUUGAGAAUACACGUUAAAAUUAAUGGAAGAAACUGAAUUGUUGCCCUA
mir-14	Csu-miR-14	UCAGUCUUUUUCUCUCUCCUAU	22	617	-23.6	scaffold15.len5230092-:1879605-1879663	CGGGGGGAGAAUCUGACUCGACUUUGUUAAAUAUCAGUCAGUCUUUUUCUCUCUCCUAU
mir-167	Csu-miR-167	AAGAAACUGAAGAAUGACCU	20	1	-49.9	scaffold383.len334286+:47803-47847	GUCAUUCUUUAGUUUCUUCCAUUAAUUUUAAAAACAUACUGUAUGUUUUUAAAAUUAAUGGAAGAAACUGAAGAAUGACCU
mir-184	Csu-miR-184	UGGACGGAGAACUGAUAAGGGC	22	34419	-18.4	scaffold265.len751361+:570358-570415	CCUUGUCAUUCUUCUCGCCCCGUGUGCUUAUACUACUGGACGGAGAACUGAUAAGGGC
mir-190	Csu-miR-190	AGAUAUGUUUGAUAUUCUUGGUUG	24	796	-19	scaffold58.len2825628-:1182920-1182976	AGAUAUGUUUGAUAUUCUUGGUUGUUGCCCUAUCACCCGGGAAUCAAACAUAUUACA
mir-193	Csu-miR-193	UACUGGCCUGCUAAGUCCCAAG	22	15	-25.2	scaffold90.len2353873-:2053822-2053876	UGGGUCUUGGCGGUCUAGUCAGUGUGCCUUUCUUACUGGCCUGCUAAGUCCCAAG
mir-2	Csu-miR-13a	UAUCACAGCCUCUUUGAUGU	20	14	-19.5	scaffold84.len2437568-:1293665-1293716	GUCAAAGCGGCGGUGAAAUGUCUGCGUCUUCAUAUCACAGCCUCUUUGAUGU
mir-2	Csu-miR-13b	UAUCACAGCCAUUUUUGACGAGUU	24	110	-21.3	scaffold84.len2437568-:1293541-1293599	UUCGUAAAAAUGGUUGUGCAGUGUAGUUAGCAUCAUAUCACAGCCAUUUUUGACGAGUU
mir-2	Csu-miR-2a-3p	UCACAGCCAGCUUUGAUGAGC	21	139	-20.2	scaffold84.len2437568-:1293382-1293437	UCACAAAGUGGUUGUCAUAUGCGUUCUCAGACAUAUCACAGCCAGCUUUGAUGAGC
mir-2	Csu-miR-2a-5p	UCGGCAAAGCGGCUGUGAUUU	21	163	-31.4	scaffold84.len2437568-:1293228-1293285	UCGGCAAAGCGGCUGUGAUUUGCUGCGUGACGCCAUAUCACAGCCAGCUUUGUUGACU
mir-2	Csu-miR-2b	UAUCACAGCCAGCUUUGUUGA	21	43	-40.6	scaffold84.len2437568-:1293224-1293291	CGGAUGUCGGCAAAGCGGCUGUGAUUUGCUGCGUGACGCCAUAUCACAGCCAGCUUUGUUGACUUCCG
mir-210	Csu-miR-210	CUUGUGCGUGUGACAGCGGCUAU	23	11	-30.1	scaffold232.len900487+:547352-547412	AGCUGCUGGCCACUGCACAAGAUUAGUAAAAAUAUACUCUUGUGCGUGUGACAGCGGCUAU
mir-210	Csu-miR-3286-3p	UUGUGCGUGUUCCAAUAGUUAU	22	10	-26.5	scaffold232.len900487+:553612-553675	AACUAUUGGUCACUGCACAGGAAUAGUGAAAGCGAGAUACUCUUGUGCGUGUUCCAAUAGUUAU
mir-210	Csu-miR-3286-5p	AACUAUUGGUCACUGCACAG	20	2	-35.2	scaffold232.len900487+:553603-553695	GCCCAAAACAACUAUUGGUCACUGCACAGGAAUAGUGAAAGCGAGAUACUCUUGUGCGUGUUCCAAUAGUUAUUGUGGGUGCUUCAUAAAGAC
mir-216	Csu-miR-283	AAAUAUCAGCUGGUAAUU	18	2536	-26.6	scaffold28.len4000090-:3740077-3740134	AAAUAUCAGCUGGUAAUUCUGGGGUGUUUUAGCACCCAGGCUAUCAGUUGAUAUGCAG
mir-25	Csu-miR-92a	UAUUGCACCAGUCCCGGCCUAU	22	1415	-26.1	scaffold20.len4710673+:1047245-1047302	GGGCGGUGACUGGCGCUAUAUUCGGUUCAUGUGCGAUAUUGCACCAGUCCCGGCCUAU
mir-25	Csu-miR-92b	CAUUGCACCAAUCCCGGCCU	20	470	-14.2	scaffold20.len4710673+:1047413-1047469	GACGCGAUUCGGUGUAAACGUUGUGCCUUAUUUUUCACAUUGCACCAAUCCCGGCCU
mir-252	Csu-miR-252	CUAAGUACUAGUGCCGCAGGAG	22	628	-23.2	scaffold19.len4725394-:4292965-4293023	CUAAGUACUAGUGCCGCAGGAGCGUUUAUGUAUUCCUCCUGCUGCUUAAGUGCUUAUCA
mir-263	Csu-miR-263a	AAUGGCACUGGAAGAAUUCACGGG	24	20632	-22.6	scaffold282.len684581-:159927-159989	AAUGGCACUGGAAGAAUUCACGGGUUUAGUUGUUACAGUCCCGUGGUCUCUUAGUGGCAUCAC
mir-263	Csu-miR-263b	CUUGGCACUGGGAGAAUUC	19	20	-24.1	scaffold226.len923647-:284302-284364	CUUGGCACUGGGAGAAUUCACAGGAGUUUGUGUGAAUACCCGUGAAUUUCCUGAUGCCUCAGC
mir-274	Csu-miR-274	UUUGUGACCGUCACUAACG	19	9	-25.3	scaffold19.len4725394-:4316374-4316435	UUUGUGACCGUCACUAACGGGCAGUGAAUUAACAAUUUGCUCGUUUUGACGAUCGCAAAAUG
mir-275	Csu-miR-275	UCAGGUACCUGAAGUAGCGCGCG	23	14855	-25.9	scaffold28.len4000090-:2130731-2130787	CGCGCUACUCCGGCGCCAGGGCUGUUCUCACGAGUCAGGUACCUGAAGUAGCGCGCG
mir-2755	Csu-miR-2755a	CACCCUGUCAGACCAUACUUGUU	23	13602	-18.8	scaffold3.len9786184+:9507422-9507480	CAAGGUGGCCUAGCAGCGUGUUUUCUCUAAGGUUUGCACCCUGUCAGACCAUACUUGUU
mir-2755	Csu-miR-2755b	CCCUGUCAGACCAUACUUGUUU	22	13203	-21.6	scaffold355.len428139-:187635-187707	CUAUCGGCCUAUCCCUGUCAGACCAUACUUGUUUUAAAGACAUAGUGAAAGCGAGAUCGGCCUAU
mir-2755	Csu-miR-2755c	ACCCUGUCAGACCAUACUUGUU	22	12425	-27.6	scaffold125.len1723007+:556946-557005	ACCCUGUCAGACCAUACUUGUUGCGUUCUCAGACAUAUCACAGCCAGCUUUGAUGAGCCAGGAAUAGUGAAA
mir-2756	Csu-miR-2756	ACCCUGUAGCUGCUUAGGGGCG	22	798	-23.1	scaffold33.len3817196-:92389-92446	ACCCUGUAGCUGCUUAGGGGCGCGGUCAUAAUUCCUCCCCUGUGCCGCUACAUUGUAU
mir-276	Csu-miR-276-3p	UAGGAACUUCAUACCGUGCUCU	22	5261	-25.3	scaffold10.len6272815-:2834700-2834755	AGCGAGGUAUAGAGUUCCUACGUAUGAUGGACUGUAGGAACUUCAUACCGUGCUCU
mir-276	Csu-miR-276-5p	AGCGAGGUAUAGAGUUCCUACG	22	492	-35.5	scaffold10.len6272815-:2834689-2834769	UGGUGAUUGCCACUAGCGAGGUAUAGAGUUCCUACGUAUGAUGGACUGUAGGAACUUCAUACCGUGCUCUUGGGUUUGCCA
mir-2763	Csu-miR-2763	AUAUUAUGCUCCUUACUUUGGAU	23	15	-17.22	scaffold66.len2634640+:1992439-1992501	CCAAAGUAGUGAACAUAAUUUAUCUUGAAACCAAUAUUGGAUAUUAUGCUCCUUACUUUGGAU
mir-2765	Csu-miR-2765a	UGGUAACUCCACCACCGUUGGC	22	123	-25.6	scaffold37.len3578051-:128410-128420	UGGUAACUCCACCACCGUUGGCCGACAGUAUUGGUGAUAAACACUGUCAUGGAUCUUUAUGAACGGAUGUUGCUC
mir-2765	Csu-miR-2765b	CUGGUAACUCCACCACCGUUGG	22	89	-24.3	scaffold22.len4589509-:4455051-44550003	AGUGCGAGUUUACCACUGGUAACUCCACCACCGUUGGCCGACAGUAUGCGAGUUUACCAC
mir-2765	Csu-miR-2765c	GGUAACUCCACCACCGUUGG	20	36	-42.2	scaffold16.len5173300-:850794-850860	UCUAGUUUACCACUGGUAACUCCACCACCGUUGGCCGACAGUAUUUGAGUUUACUCUAGUGCGAGUUUACCA
mir-2766	Csu-miR-2766	UCAGUCUUGUCGAAUGGUG	19	13347	-20.3	scaffold72.len2569569-:2085757-2085805	CCAUUCCUCUUGACUAGAGCUGUCUGAGCUUCAGUCUUGUCGAAUGGUG
mir-277	Csu-miR-277	UAAAUGCACUAUCUGGUACGACA	23	315	-39.7	scaffold102.len2121367-:832699-832783	UCGUGCCAGGAGUGCGUUUGCAAAGCACGCGACAAGUUUGCGCUAAUGCAAAGUUGACACUGUAAAUGCACUAUCUGGUACGACA
mir-278	Csu-miR-278	UCGGUGGGAUCUUCGUCCGUUU	22	2206	-29.7	scaffold41.len3543598+:1041537-1041594	CCGGACGAACUUCCCAGUUCGGCCGACAUUAAUGGGUCGGUGGGAUCUUCGUCCGUUU
mir-2788	Csu-miR-2788	CAAUGCCCUUGGAAAUCCCAAA	22	2	-24.3	scaffold90.len2353873-:2046997-2047052	UGGGGUUUCAAAGCGGCAUGUGCCUCCCAUUAUGCAAUGCCCUUGGAAAUCCCAAA
mir-279	Csu-miR-279a	UGACUAGAUCCACACUCAUCCA	22	887	-24.6	scaffold115.len1822984-:1112110-1112167	GAUGAGUGGAGGUUUAGUGCAUGUUUUUAUACACCAUGACUAGAUCCACACUCAUCCA
mir-279	Csu-miR-279b	UGACUAGAUCUACACUCAUUGA	22	2643	-20.3	scaffold1.len11383612+:9688092-9688150	GAUGGGUAUAAGUCUAGUGGCACAGUGUUCUAUUCUGUGACUAGAUCUACACUCAUUGA
mir-279	Csu-miR-279c	UGUGACUAGAUCUACACUCAUUG	23	1734	-19.5	scaffold1.len11383612+:9688303-9688359	GCGAGUUUGCUUCUGGUUCAUGUUCUCAAUUCAUCAUGACUAGAUCCAUACUCGUCU
mir-279	Csu-miR-279d	UGACUAGAUUUUCACUUAUCCU	22	297	-23.2	scaffold75.len2555587-:1223187-1223244	GAUAAGUGAAUCUCUAGUGCGAGUUUACCACUAUCUUGACUAGAUUUUCACUUAUCCU
mir-2796	Csu-miR-2796-3p	GUAGGCCGGCGGAAACUACUUG	22	333	-42.2	scaffold128.len1711671-:193553-193622	AGUCGGCAGGGGUUUCUUUCGGCCUUCAGCUGUUUAGAGUCUGUAGGCCGGCGGAAACUACUUGCCGGCU
mir-2796	Csu-miR-2796-5p	AGGGGUUUCUUUCGGCCUUCA	21	7	-42.2	scaffold128.len1711671-:193553-193622	AGUCGGCAGGGGUUUCUUUCGGCCUUCAGCUGUUUAGAGUCUGUAGGCCGGCGGAAACUACUUGCCGGCU
mir-281	Csu-miR-281-3p	UGUCAUGGAGUUGCUCUCUUUA	22	3	-38	scaffold58.len2825628-:2332428-2332506	AUCUGUUAAUGAAGAGAGCUAUCCGUCGACAGUAUUGGUGAUAAACACUGUCAUGGAGUUGCUCUCUUUAUGAACGGAU
mir-281	Csu-miR-281-5p	AAGAGAGCUAUCCGUCGACAGU	22	13526	-26.3	scaffold58.len2825628-:2332437-2332495	AAGAGAGCUAUCCGUCGACAGUAUUGGUGAUAAACACUGUCAUGGAGUUGCUCUCUUUA
mir-282	Csu-miR-282	UAGCCUCUCCUUGGCUUUGUCU	22	72	-25	scaffold11.len6090138+:5201409-5201472	UAGCCUCUCCUUGGCUUUGUCUGUGUUAUUCAGUAGUUUCAGACAUAGCCUGAUAGAGGUUACG
mir-29	Csu-miR-285	UAGCACCAUUCGAAUUCAGU	20	565	-18.2	scaffold5.len9039658-:1410130-1410185	UGUAUUCGAGUGCGUGGGUGGAGUGAUUUUAUUCUCUAGCACCAUUCGAAUUCAGU
mir-306	Csu-miR-306	CAGGUACUAGGUGACUCUGA	20	3	-65.4	scaffold164.len1346937+:131458-131566	GCGGGCGGUGCGUGGUGCGUGGUGCCAGGUACUAGGUGACUCUGAGUGGCGCGCGGUCUCAGAGCCGCCUGGUGCCUCAGCACACCGCCGCCGCUAUACUGCCGCCCUC
mir-308	Csu-miR-308	AAUCACAGGAUAAUACUGCGAG	22	238	-29.9	scaffold1.len11383612-:3833608-3833663	CGCGGUAUUAAUCCUGUGAAUGUGUUUUUAUUACAAUCACAGGAUAAUACUGCGAG
mir-31	Csu-miR-31	AGGCAAGAAGUCGGCAUA	18	600	-51.22	scaffold270.len739949+:274302-274392	GAGCCGGUGGCUGGGAAGGCAAGAAGUCGGCAUAGCUGUUUGAUGAUUAUAUACGGCUGUGUCACUUCGAGCCAGCUCAAUCCACCGGCUU
mir-316	Csu-miR-316	UGUCUUUUUCCGCUUUGCUGCU	22	6	-22.1	scaffold45.len3260848-:1293279-1293341	UGUCUUUUUCCGCUUUGCUGCUGAGUAUUUUCAAAAUGUCAACAGCAAAGUGAAAAGGUCUCC
mir-317	Csu-miR-317	UGAACACAGCUGGUGGUAUCUCA	23	1041	-28.2	scaffold102.len2121367-:861446-861505	GGGUGCCACGCUGUGCUCUCUCGGGAAUAGGGGCGAGUGAACACAGCUGGUGGUAUCUCA
mir-34	Csu-miR-34	UGGCAGUGUGGUUAGCUGGUU	21	1067	-34.4	scaffold102.len2121367-:813638-813752	AGCAAUGAAAAUAGAAGAAACUGCAAGACAUGUGAAGCUUAAUUAUGGGUUGUCCGCAUUGGCAGUGUGGUUAGCUGGUUGUUUAGUCCAGGCAACAGCCACUAACGUCACUGCU
mir-375	Csu-miR-375-3p	UUUGUUCGCCCCGGCUCGUGU	21	14	-22.7	scaffold151.len1516712-:1079996-1080050	CCGAGCGGUCUGAGCAAACUAUCCUGUGUACUAGUUUGUUCGCCCCGGCUCGUGU
mir-67	Csu-miR-307	UCACAACCUCCUUGAGUGAGCGA	23	50037	-27.8	scaffold41.len3543598-:667770-667837	ACUCACUCAACCUGGGUGUGAUGUGUGCACUAGUUGCUCGGCCCAUCACAACCUCCUUGAGUGAGCGA
mir-7	Csu-miR-7	UGGAAGACUAGUGAUUUUGUUGUU	24	207	-17.7	scaffold96.len2246483-:2108309-2108367	UGGAAGACUAGUGAUUUUGUUGUUUUGAUUGGCUAACAAGGAAUCACUAAUCUACCUAC
mir-71	Csu-miR-71	UGAAAGACAUGGGUAGUGAGAU	22	138	-39.6	scaffold84.len2437568-:1316532-1316617	UGCUCUUUACUCCAUGAAAGACAUGGGUAGUGAGAUGUCCCGUACAUCACAAUUCUCACUACCUUGUCUUUCAUGCGGAUCGAGCA
mir-745	Csu-miR-745-3p	CAGCUGCCUAGCGAAGGGCA	20	27	-24.5	scaffold93.len2299681+:1017779-1017836	CGGCUCAUCGUAUGGCAGUUUGCUGUGUAGUUUGCCAGCUGCCUAGCGAAGGGCAACA
mir-745	Csu-miR-745-5p	CGGCUCAUCGUAUGGCAGUUUGC	23	71	-18.91	scaffold93.len2299681+:1017885-1018011	GACUGACUCAAGAAGAAGGAAGCAUUCAGAAAUUUCCAAGUUUUCGGUGUUGUUUCAAUGACAUUACUUUUUUGGCACAAUUAUUGUUAUAAGUCGCGGCCUAUAAUGUUCAAUAUUAAAGAUACGUC
mir-750	Csu-miR-750a	CCAGAUCUAUCUUUCCAGCU	20	2397	-16.4	scaffold17.len4986324+:180449-180506	UUGGACAGGGGAUCUUGACAGUUUGACGCAAAAUGCUGCCAGAUCUAUCUUUCCAGCU
mir-750	Csu-miR-750b	GCCAGAUCUAUCUUUCCAGC	20	263	-34.3	scaffold218.len993866+:763858-763917	GAUAUGAUUGCGGCCGAGAUGCUACGAGCGGCGGGCUCACCUCGGCCGCAAUCGUAUUCC
mir-8	Csu-miR-8	UAAUACUGUCAGGUAAAGAUGU	22	10855	-19.8	scaffold383.len334286+:187044-187103	AUCUUACCGGGCAGCAUUAGAGUCGUAUCGUUAUUUUCUAAUACUGUCAGGUAAAGAUGU
mir-87	Csu-miR-87	GUGAGCAAACUUUCAGGUGUG	21	17	-23.2	scaffold181.len1223308-:9191-9246	GGCCUGAAUUGUUGCUCUAACCUGUAUUCGUCUAGGUGAGCAAACUUUCAGGUGUG
mir-9	Csu-miR-9a	AUAAAGCUAGAUUACCAAAGCA	22	100	-21.8	scaffold164.len1346937+:131664-131721	CUUUGGCGAUUUAGCUCCGUGACGUGAUACAAGCUCAUAAAGCUAGAUUACCAAAGCA
mir-9	Csu-miR-9b	UCUUUGGUUAUCUAGCUGUAUGA	23	1991	-24.3	scaffold95.len2267344-:966253-966313	UCUUUGGUUAUCUAGCUGUAUGAGUAUUCAUAGACGUCAUAAAGCUAGGUUACCGGAGUUA
mir-9	Csu-miR-9c	UAAAGUUAUGGUACCGAAGUUA	22	303	-53.9	scaffold164.len1346937+:126399-126524	GUAGUUGUGACAAGGGGCGGCUCGCCUCUUUGGUAUCCUAGCUGUAGGCAGUCGCGCGCCCUAAAGUUAUGGUACCGAAGUUACGAGUCGCCGCGCAUGCGCCGCACGCUGCCUGCUGCCUGCUGC
mir-927	Csu-miR-927	UUUAGAAUUCCUACGCUUUACC	22	8	-29.5	scaffold175.len1276902-:874449-874519	UUUUGUUUUAGAAUUCCUACGCUUUACCGUUGCCGAGUUGUUAGGCAAAGCGUUUGGAUUCUAAAACAAAA
mir-929	Csu-miR-929	AAAUUGACUCUAGUAGGGAG	20	1	-40.1	scaffold143.len1607457-:681229-681310	CUCAUUGAUGUUAAAUUGACUCUAGUAGGGAGUCCGUUGCUUCUGCGCGACUCCCUAAUCGAGUCAGGUUGACUUCUUUGAG
mir-932	Csu-miR-932	UCAAUUCCGUAGUGCAUU	18	6	-36	scaffold103.len2108851-:193727-193793	UGACCUCAAUUCCGUAGUGCAUUGCAGUGUAUACGUACUCCCUGCAAGCAGUGCGGAAGUGAGGUUA
mir-965	Csu-miR-965-3p	UAAGCGUAUAGCUUUUCCCCUU	22	11	-30.84	scaffold425.len251261+:93484-93558	UGACUAAACGGGAGAAGUUAUUACGCUAUAUGUAAUAUUUUCUAAUCAUAAGCGUAUAGCUUUUCCCCUUAGUCA
mir-965	Csu-miR-965-5p	CGGGAGAAGUUAUUACGCUAUAU	23	167	-24.34	scaffold425.len251261+:93492-93553	CGGGAGAAGUUAUUACGCUAUAUGUAAUAUUUUCUAAUCAUAAGCGUAUAGCUUUUCCCCUU
mir-970	Csu-miR-970	UCAUAAGACACACGCGGCU	19	2104	-22.1	scaffold2624.len16062+:15140-15198	CCUUGCGUGUGAUCUUAUUGGUAGUGUGGCCGAUAAUCUAUCAUAAGACACACGCGGCU
mir-981	Csu-miR-981	UUCGUUGUCGACGAAACCU	19	4	-20	scaffold276.len693140-:145723-145772	GUUUCGGGACGAUGUAACCGUGCUAAUCUGGUUCGUUGUCGACGAAACCU
mir-989	Csu-miR-989a	UGUGAUGUGACGUAGUGG	18	923	-16.8	scaffold183.len1185789-:688777-688830	AUUACCUCACAGUCACGUGGUCAUAACGGUACAACGUGUGAUGUGACGUAGUGG
mir-998	Csu-miR-998	UAGCACCAUGGGAUUCAGCU	20	1373	-23.2	scaffold116.len1819713+:1105060-1105109	CUGUCUCCCGUGUGGCUGCAGUGCCUCGUGUAGCACCAUGGGAUUCAGCU
mir-iab-4	Csu-miR-iab-4-3p	CGGUAUACCUUCAGUAUA	18	49	-37.3	scaffold134.len1674468+:884053-884135	GUCGCCUUCUGUACGUAUACUGAAUGUAUCCUGAGUGCCUCAUUCUUUCCGGUAUACCUUCAGUAUACGUAACAGAAGAUGAC
mir-iab-4	Csu-miR-iab-4-5p	ACGUAUACUGAAUGUAUCCU	20	2098	-37.3	scaffold134.len1674468+:884053-884135	GUCGCCUUCUGUACGUAUACUGAAUGUAUCCUGAGUGCCUCAUUCUUUCCGGUAUACCUUCAGUAUACGUAACAGAAGAUGAC
Nd	Csu-miR-1876	AUAAUUGGUUUUUGCGGCU	19	4	-23.3	scaffold15907.len1032+:858-876	AUAAUUGGUUUUUGCGGCUGUCCGACCGGGCAGUGCCGCGAAGCUACCAUCUGCUG
Nd	Csu-miR-2768	UUGGUUAAGAUAUUGCAUC	19	36	-24.8	scaffold15.len5230092+:3898275-3898344	UGUAAUAUUUUGACCAAUUUUAUAUAAUUAUGCGUUCUACAGCAGAGAGAAUUGGUUAAGAUAUUGCAUC
Nd	Csu-miR-2779	AUAUCCGGCUCGAAGGACCA	20	151	-63.3	scaffold9.len6417526-:720235-720320	UAAGUAAAGAAUUAAUGGUCCUAUGAGCUGGAUAAUAUACUACAUAUUAUAAUAUCCGGCUCGAAGGACCAGUGGUUCUUUACUUA
Nd	Csu-miR-2783	UGGGAGGGUGGGCUGUGGCG	20	2	-38.4	scaffold162.len1382934-:913419-913481	UGGGAGGGUGGGCUGUGGCGUCUAACUCCUUAGGCGAGGGGGGGGAGCGGUUUACCCUCCCAUA
Nd	Csu-miR-3002	GAUAUGAUUGCGGCCGAG	18	10	-25.2	scaffold218.len993866+:763858-763917	GAUAUGAUUGCGGCCGAGAUGCUACGAGCGGCGGGCUCACCUCGGCCGCAAUCGUAUUCC
Nd	Csu-miR-3692a	GUAUCCCACUUCUGACACCA	20	10	-30.16	scaffold226.len923647-:121032-121126	GACCCGUUAUGGAAUACCAGCGUAAGAAGACAACGAAAAAACGACGAUAAUUACACUGGUAUCCCACUUCUGACACCACUGUUACGGGGCGGGUC
Nd	Csu-miR-3692b	UAUCCCACUUCUGACACCA	19	53	-19.9	scaffold28.len4000090+:3135074-3135136	UGUCACUAAAUAAAACAAGUUUCAACGGGUUAGAUUCACUGAUUGUAUUUAUUUAUUGACGUU
Nd	Csu-miR-3692c	AUCCCACUUCUGACACCA	18	27	-18.4	scaffold12.len5976366-:2922608-2922627	UCUAUGUACAUAUAUUAAGUUUGACUUAACUUAAAAUAUGUAGAUAGACU
Nd	Csu-miR-6094	UAUUCGAGACCUCUGCUGAUC	21	108	-42.6	scaffold28.len4000090-:479393-479471	UCAGCGGUGGUCUGGGGUACCUAUUCACAGUCGGAUCACCCAUAGUCCGGCGCGAUGGUAUUCGAGACCUCUGCUGAUC
Nd	Csu-miR-6307	CAAGCUCGAACUUUUCCUGCGU	22	30	-24.7	scaffold154.len1493640-:819385-819447	GUGGGAAAAGCUCGUAUUUUGACGUGGGCCGGUGCAGUAGUCAAGCUCGAACUUUUCCUGCGU
Nd	Csu-miR-6799	UGGGGAGGUGCGCGGGUU	18	9	-19.8	scaffold38.len3557774+:1245342-1245409	UGGGGAGGUGCGCGGGUUUACCGGGUUUGGGGAUGCCUAUUACGAUGGCUUGUGGCUUCUUUCAAAGU
Nd	Csu-miR-7199	UGUGUUAAAAAGCGAAAG	18	45	-19.5	scaffold356.len421762-:110358-110394	UGUGUUAAAAAGCGAAAGAGUCGCUUUUUGACACACA
Nd	Csu-miR-8028	UUCAUAAAUUAGAAAUAAGG	20	4	-19.2	scaffold112.len1935101+:976414-976433	UUACGGGCUUUUUGUGGUUUAUGAAUUUUAUGUAUUUUCAUAAAUUAGAAAUAAGGAGAUCCGUAG
Nd	Csu-miR-8498	GUGGGGCAAAUUGCGAAAGC	20	5	-32.6	scaffold38.len3557774-:3047012-3047064	UUUCGCAAUUUGCCGCACCCGUAAGUCACCGGGGUGGGGCAAAUUGCGAAAGC
Nd	Csu-miR-9314	GAGGAGGGCUGAGGUAGGGUU	21	6	-20.9	scaffold2591.len16312+:4204-4262	CCCUACGCCAAUUCCAGUCGGGGCUAGAACCAGAGCACGAGGAGGGCUGAGGUAGGGUU
Nd: not determined

## Sheet: novel
Table S2-2 Discovery of 197 novel miRNAs in C. suppressalis
miRNA name	Mature miRNA sequence	Length	Reads counts	Free energy	Loci	Precursor sequence
Csu-novel-1	UGUUGUUGUUGUUGUUGUUGUUU	23	11	-18.5	scaffold72.len2569569+:1324860-1324882	AGGUUUUUGUUGUUGUUGUUGUUGUUGUUGUUUGAGAAUGAUUGACGUAACAUCGCGCUUGUUCAUGACGACGGGGAAUCUAUACUAAUAUAUAAAUCUA
Csu-novel-10	UGGGAUUAAGAUCACAAUGAUAUGGCG	27	157	-24.3	scaffold119.len1753049+:1666628-1666669	UGGGAUUAAGAUCACAAUGAUAUGGCGGCAAACGCGAUAUCUUGUGACCCAGUCCUUUU
Csu-novel-101	UCGUAACAGAUUCGUCAUCCUG	22	4	-35.1	scaffold62.len2689551+:964075-964176	GCCAGCCGGAGCGCAUAGGCCCUCGUAACAGAUUCGUCAUCCUGGGGGCGAGCUACCCCAAGAUGAUCAGGAUCAUCAGCGGGAUCGCAUGGCAAAACACAA
Csu-novel-102	AACAGCACGUAGAUGAGUUCG	21	3	-35.3	scaffold246.len841550+:167724-167833	AUAAUCGGCAUUGCCAUACUCUAACAGCACGUAGAUGAGUUCGCAUACGUAUGCAAACUGACCUAUGUAAUGUAAGAGUUAGCAAAACUGAUGAACAUCACGUUGGAUGU
Csu-novel-103	UGAACGUGUCUCUCUCUGAAGUGCUA	26	4	-35.4	scaffold75.len2555587-:2004442-2004551	UUGUUAUGGGCCCUCCGCAACGCGUUUUGGUUUCUUCAGAGGAGGAUCGCGGUAUUGCUUUGAACGUGUCUCUCUCUGAAGUGCUACAGAAGUUUUGGGAGGUUGAAGAA
Csu-novel-104	UCACUCUGAAUACGCAAACAGAGCGGCUA	29	4	-36	scaffold214.len1014803-:310104-310213	CCUGAAAUACCGCUAGAAGGCGAGCACGUUCAGUGGCGUUUUCAGAGGAUGCUAAAAGAUCACUCUGAAUACGCAAACAGAGCGGCUAGUCCCACUGCUAUACCAUGCGC
Csu-novel-105	UCGCGGUUUGAUCCUUGAGGACGCCAUU	28	31	-35.7	scaffold129.len1702780+:692213-692322	UAAAGAACGCUAACGUGAGAGAUCGCGGUUUGAUCCUUGAGGACGCCAUUAGGAAGAGAAGAUGGUGACCGCGCGGAUAGCGGUGAUGAGUGCGCGGUGUUCGGCGAAGA
Csu-novel-106	UCUGGAAUGUGAGAGUAUAUUGUUGUA	27	6	-34	scaffold37.len3578051-:2074419-2074528	CAGUGGCAGCCAUAACUUUAGUAUGCGUUCAAUUGCUGGAAGUAGUGAAAGCCACCGGCUUCUGGAAUGUGAGAGUAUAUUGUUGUAGUCUAUUGCUGCAGCCUCACAAA
Csu-novel-107	CAAGAGAAUGGAAUAAUAAAUU	22	16	-36.1	scaffold205.len1091610-:435021-435121	CAAAAAUCACAAAAUUAUUAAAUUAAUUAUUCCGUUCUCUACGGUUUAAAAAGUUCCCAAGAGAAUGGAAUAAUAAAUUUAAUGAUUUUGUUGUUAAGGAA
Csu-novel-108	GGGGAUGUAGCUCAGCGGUAGAG	23	27	-36.1	scaffold13.len5442586+:1754156-1754265	CUUUGUCGUUGUAUUCUCGAGAGGGGAUGUAGCUCAGCGGUAGAGCGUUCGCUUUGCAUGUGAAAGGCCCCGGGUUCGAUCCCCGGCAUCUCCAAAAGUCAACGAUUAGG
Csu-novel-109	UUAGAACACUUUCGCGGCAUAUUUACAA	28	21	-44	scaffold14.len5375714-:1514269-1514359	AAUUCUCCACACACAUAACAAAAAAUGCCGCGAAAGUGUUCUAAUAACCCAGACGGUUAUUAGAACACUUUCGCGGCAUAUUUACAAUGUA
Csu-novel-11	UGUCAGUCGCUGCCAUAGGAUGGGUC	26	7	-24.5	scaffold418.len268119+:5034-5109	UGUCAGUCGCUGCCAUAGGAUGGGUCGUUUCACUAGUAAUGAUCGCCCUCGACCCCUUGUGGUGAAGCUGUAUGAU
Csu-novel-110	UGAGAAGUGAUCCUUCUUACUAGG	24	48	-36.5	scaffold128.len1711671-:1479393-1479502	AUAUUUCUGAAGGGUUAAAGCUUAGUUAACUCACCCGCUUGCCCAAGGCGUCUUGGUGAGUGAGAAGUGAUCCUUCUUACUAGGACUGUGGGCGCUACCGUUGGCGCUAA
Csu-novel-111	UGAGGCAGGUCGAUAGAAUUAUU	23	8	-36.5	scaffold61.len2763490-:453727-453836	CUUACAACUCGAAGGCUCGCAUUGAGGCAGGUCGAUAGAAUUAUUGAAAGUAAUUAAUUUCUUUCGCACUGGCUUGAAGUGAGCCGUAGAACUCGACGGGAGUGUAUGCA
Csu-novel-112	UGCCGCGACUUAUAAGUAAUC	21	4	-36.6	scaffold7.len6899119+:5447766-5447859	CAGCGCGGCCACAUAUUACUUAUAAGUCGCGGAACGCAACUGCUAGUCUUGUGCCGCGACUUAUAAGUAAUCUGACCAUUAUUGCGCAGAAGUA
Csu-novel-113	UACAGGAUUCUGAUGAAUGGGUUUUUAA	28	82	-36.8	scaffold106.len2046629-:1923967-1924105	CUGACCUCCCUCGUGGGGGACCUCAGCGUCGGCAUGCUGAGUAGCACAAGCACUAUCGUCACUAUUCACUGUUUUGGUGGAAAUCAAAUAAUACAGGAUUCUGAUGAAUGGGUUUUUAAUAUAGAUAGAUGUCAAAGAA
Csu-novel-114	UCUUAAUGGUCGGUGGUGGAGGCGC	25	4	-36.8	scaffold54.len2946595-:967425-967530	UGUUGGAGGUUCGCCUGGAUGAUCUUAAUGGUCGGUGGUGGAGGCGCCAUCAGAAGAUAGCAGCACAUCAACAUUGACCUCCUGAUCGAUGAUCCCAUCGAGCCUG
Csu-novel-115	UGAGAAGUAAAUUUAGAACCGU	22	1	-36.9	scaffold56.len2909707+:1780488-1780587	ACAUUAUGAAAAUUCUUGGAACUGUUCUAAUUUUACUCGUCUAUGUUUGGAAACAUUGAGAAGUAAAUUUAGAACCGUUCCAAGAAUAAGCAUUGACUAC
Csu-novel-116	UGGAAUCGUUCGUCGAAGGUCC	22	25	-37	scaffold137.len1664181+:347785-347879	GACGCGUGGAAUCGUUCGUCGAAGGUCCGUGGUGUGUGGUCACGUUGCGUUGACUCAGCGCCUCGUGUCCGUCGUUGUCGCAAUCCAUGUGUUU
Csu-novel-117	UGAACGAACGUAUGGACUUGUAACCGGUA	29	12	-32.8	scaffold372.len366053-:344658-344757	AACGAAUGAACGAACGUAUGGACUUGUAACCGGUAAACUCCGGUUUACCUGUUACAAGUUAAGUUACGCGUCGACGUCGCGUUGUCAGUAGAUAUUAACG
Csu-novel-118	UACUACUUGUAUGGCACGGAGCGAGC	26	2	-37.9	scaffold32.len3916047+:2222584-2222692	GCCGUGCCUGCAGCUAGGGAGAUACUACUUGUAUGGCACGGAGCGAGCGUAUCCACGCAAGUUGCGUCUCAUACUAGAGGACGACCCUGCUUCCAAGGAAUGAGCAUCAU
Csu-novel-119	UGAGACUGUGCAAUGCGAGCGACGGAC	27	6	-37.9	scaffold357.len419897+:404562-404668	CUAGGCAUCCCCCCACGACGGGUGAGACUGUGCAAUGCGAGCGACGGACCACCCUGUCCGCAGCCCGCAGUCCCACUAGGGUGGACAGAGGGUCUAUAUCUCCCCUACUC
Csu-novel-12	UUGCAAAAACGGACGAUGGGUUGGAC	26	4	-26	scaffold72.len2569569-:1874100-1874184	UUGCAAAAACGGACGAUGGGUUGGACUAUUCGACCUGACUUAGUAACAUACGUCGGUGUCGAAUACGCGUUAUCGCCGCGCGGUU
Csu-novel-120	UGGGAGGCAUGUGGGAGGUG	20	12	-37.9	scaffold22.len4589509-:245515-245624	CACUGUGCAUCCCGCGGGACUCCUGGCUGCCACUCGUAUGUUGAUUAAAUUUAUUGUAUUAAGCGAUGGGAGGCAUGUGGGAGGUGACCCGCGGCCAAGUGGUGAUUUGU
Csu-novel-121	UGGUGUCAUCUUUGGGCUGGGCGUCA	26	89	-38.1	scaffold72.len2569569-:1531635-1531724	UGUGGCUGAUCUUGGGUUGUGGUGGUGUCAUCUUUGGGCUGGGCGUCAAGGGGGGCGUCCGUCGGCGGUGUGUUACUCGCACGACGGGUCCUUUUGCGGCGGCGUUUUGG
Csu-novel-122	ACGUGCUUAAUUCGGAGUCU	20	3	-38.3	scaffold91.len2345885-:2164229-2164338	ACAUUUCAUUUCAAUUUUUAGGUCUUUCUGUCCUUUUCACUCCGAAUUAAGCACGUUAUGUCUAUAACGUGCUUAAUUCGGAGUCUGUCUAGACUGUUGUUAAGUUUACA
Csu-novel-123	UAUCAUAGCGCUGUGCGAGGG	21	5	-38.3	scaffold289.len644359+:468372-468480	NUAAUGCUGUCUCGCACAGUGUUGUUUCUGUUUGCACUUCGCGCGAUGCUAUAGUGGUAGUGUGCCUAUCAUAGCGCUGUGCGAGGGAGACUGUAAUGCUUUCUCGCACA
Csu-novel-124	GUGGCCUCCCAAGUGUGCAACAAUU	25	17	-27	scaffold30.len3988525+:167312-167421	ACCAUUUAUUGCCUAAAAUGAUGCACACACAUAGUACCAUACACCUUGCAUUAUUAAGGUUGUGGCCUCCCAAGUGUGCAACAAUUUUUAUCAAAGUACCUAGUUGGUAU
Csu-novel-125	CCGGGUGGUGUGGUGUGAGGGCA	23	34	-38.7	scaffold75.len2555587-:1307534-1307643	UUCGUUAUCUAAAUAUUUGUUAGUGGGAAGCCGGGCAAUCUGUGCAUUGCCUGCGGCUGACCGGGUGGUGUGGUGUGAGGGCAGGCUUCCCCCUCCAAGGGGUAGACAGG
Csu-novel-126	UCACUGGAUCUUGAGAUAACU	21	33662	-38.8	scaffold131.len1692135+:788410-788513	CACAAUCUUGUCAUUUAACGGCAGUAUCUCAUCUUCAGUAGACAUGUGUGCUCUUUUGUCACUGGAUCUUGAGAUAACUGCUGUGAAUGACAAAAUGUCAUCAA
Csu-novel-127	UUCAAUCUCCUCAGGAAUAGCAACGGCGC	29	1	-39.2	scaffold173.len1286082-:579277-579404	CAGUCGUGAUUGAACCAGAGGUUACGUGUGCCCUUACUGAUGAGAUUGGAAUGAGGAAUAUAGUAUUCCAUACCCAUUUCAAUCUCCUCAGGAAUAGCAACGGCGCUGGUCGAUAGUUCCUUGUCACU
Csu-novel-128	UCACUGGGCGAUUUGAUGACU	21	4464	-39.4	scaffold131.len1692135+:805371-805479	AUUUUAUUACAUUUUGUCUAACAGUGGUAGUUGUCAUGUGCUCAGUAGACAUGUUCUCAUUCUGUCACUGGGCGAUUUGAUGACUACUACGGUUAUGGCAUGAAAAAAAU
Csu-novel-129	UGCGGUAGAUGUUCCGAGAAGAUGCUA	27	9	-53.1	scaffold2.len10331172+:5233801-5233888	ACUGCGGUAGAUGUUCCGAGAAGAUGCUACGUAGCUAGCAUCUUCUCGGAACAUCUACUCGUAGAAGAUGGUGGAUGUUAUCUAUCCA
Csu-novel-13	UAUCGACACAGUAGGGUGCGCGCCAUG	27	33	-26.5	scaffold1942.len24547+:14288-14360	GGGCCUCAUCUUUGCUGACGGUGAUGUGUGCUGGCUUCAGCCUAUCUAUCGACACAGUAGGGUGCGCGCCAUG
Csu-novel-130	CAAGUAAAUCUCGUGCGGCUUA	22	1920	-39.6	scaffold230.len909133+:376392-376489	AAUACAACUUUUGAUGUGGCUCCAAGUAAAUCUCGUGCGGCUUAUUUCUAUUUAAGCUGUACGAGAUUAACUUAGAGUAAUGUCGAAUUUCGCCACUG
Csu-novel-131	CUAGACAGGAAUCGACUGAGAC	22	123	-39.7	scaffold10.len6272815+:4107923-4108021	GCUGACCUAGCACCUUGUGCGUCUAGACAGGAAUCGACUGAGACUUGCCACCAGUCUCAGGCUAUUCCUUUCCAGGCGCAAAAGGCUAGCAAUCACCGG
Csu-novel-132	UGCCAUUACAUUUUAAAUACCUCGCCGUA	29	3	-39.7	scaffold31.len3930475-:497859-497968	CAAUCAGUGCCAUUACAUUUUAAAUACCUCGCCGUAUACGGCGAGUUAUAGAAAUUAUCCAUAACUCCGUUAUUCGGAAAAGGACAUACUCUUUUCCGAGUAACGGCUUG
Csu-novel-133	UCAAAGACAAAGGUAGCACCAAUAAAACA	29	15	-39.8	scaffold4100.len9244-:8645-8681	CCUCAAAGACAAAGGUAGCACCAAUAAAACAGGUGAUUUAUUGGUGCUACCUUUGUCUUUGUUUUCACUACACACAAUUCCACGUUUGG
Csu-novel-134	UUAGAUUUGAAGAGGACCGCAAAGUGC	27	5	-39.8	scaffold16.len5173300+:4438647-4438756	UUGAAUGGAGUGGGACUGAGGGUUAGAUUUGAAGAGGACCGCAAAGUGCAUUCUGAUAUGCACUUUGCGGUCCUAGUAUCAAGAAACGAGAAACAUUCUUUUAGAUAGGG
Csu-novel-136	ACGGUCAAGUAGUUUAAUAGCAGCAU	26	7	-40.3	scaffold202.len1108920-:217291-217400	GGUUUAAAUAUAAAGCUUUCAGUGACGGUCAAGUAGUUUAAUAGCAGCAUUUUACCUGAAAUAAAAUGCAUAUUAAAAUACUUACCUCACUGAAAGCUUUCACUUAAAUU
Csu-novel-137	AUAGUUUUGUAGAUGACUUCA	21	9	-40.4	scaffold152.len1513173-:697736-697836	CAUCAUGAGCAAUUUUACAGAAAUAGUUUUGUAGAUGACUUCAAUUAACAACUUAUUGAAGCCAUCUACAAAACUAUUUGUGUACUCAUGUUUUUAACUGU
Csu-novel-138	UAAGUAUCAUCACUCUGUGCGGUAAACC	28	2	-40.4	scaffold113.len1887973-:1665900-1666009	CUGAGUCGGCGUUUUUCCUCAAUAAGUAUCAUCACUCUGUGCGGUAAACCUGUGGAGCUUUUACCUACAGAGCGAGUGUGAGCGGCUGAAUUUAGCGCCGACUCACCGCGG
Csu-novel-139	UGAGCGUGUGUGAGGAGUAGGUGUGAG	27	4	-40.7	scaffold1187.len43493-:26389-26498	AUAGCUGAAGGUUCAGCAACACCGACCUGGCCUCCUCACUCAUAACCGCUGGUGCCAUGACUGAGCGUGUGUGAGGAGUAGGUGUGAGGGGGAGGUGUGAGGGCGUAUAU
Csu-novel-14	UUCUGUGGUAAUGGUCGACUAGAAGGC	27	27	-26.5	scaffold12838.len1363-:480-555	UUCUGUGGUAAUGGUCGACUAGAAGGCGAACGGAAGGAUGACGAGCGUCUAAAAUAAUCGGCCGUUUCACGGUAUC
Csu-novel-140	CGGGCUAGAGGGGGGAGGGUG	21	4	-40.9	scaffold110.len1980022+:1127756-1127865	UGAGUGCUGGAGUGAGUUGCUGGCGGGCUAGAGGGGGGAGGGUGCAGCGCUCACUGCACGCCGCUCACUUCUCUCGUCUCCACUGCGUGUCGUCUGCGCACAGCUUACAU
Csu-novel-141	AGAGAGCACAUAAUAGAACUGUUU	24	8	-41	scaffold47.len3168181-:2888610-2888719	UCUCUCCAACGCUGUGUGUUUAAGAGAGCACAUAAUAGAACUGUUUUGCAUUAAAACAAAACAUAUAUUAUGUGUUGAAUAAAACACACAGCGUUACAGCAAGAGCCUUG
Csu-novel-142	GAGAGCACAUAAUAGAACUGUUUU	24	39	-41	scaffold47.len3168181-:2888610-2888719	UCUCUCCAACGCUGUGUGUUUAAGAGAGCACAUAAUAGAACUGUUUUGCAUUAAAACAAAACAUAUAUUAUGUGUUGAAUAAAACACACAGCGUUACAGCAAGAGCCUUG
Csu-novel-143	GAGCACUGGAUUAACGGGGACUGAUC	26	18	-41.2	scaffold140.len1630091+:1370916-1371025	UGUGGCCAUAGCCCAGAAGUGGGAGCACUGGAUUAACGGGGACUGAUCUUCCACAGCGAAGAUUCCCCACUGUAGUUGAAGAGUCCCCGCGUCUGUCAGCUGCCGCCAGA
Csu-novel-144	UGGAAGUGUAUGGUGAGCGAUGUCGAA	27	4	-41.3	scaffold70.len2583446-:811182-811282	AAAAUCUUUGCAUUACCCCUGGUGGAAGUGUAUGGUGAGCGAUGUCGAAUAGUGCGAAGGAUGAAUAAGAUCGUCGCACCAUUUGACACCGAGGGCACUGACACCGGGUU
Csu-novel-145	UCCAUCGGGCCCCUCGUAGAGGACUG	26	2	-41.4	scaffold110.len1980022-:512036-512145	CCAUGGCCCGAGAGUAUACGCCUCCAUCGGGCCCCUCGUAGAGGACUGACUUCCCCUGCUGGUAGUCCUCCACGAUGGCUGCUGGUAUGGAGGCACGCAGUGAAAACGCA
Csu-novel-146	UGAGACUGUAUAUCCCACGUAAG	23	2	-41.7	scaffold99.len2185542-:463165-463274	CUUCAUCCACGCUCCUCUGUUAUGAGACUGUAUAUCCCACGUAAGUGUGGAGGUCGUGGCUUUUUAAAUGCCAAGAAUCUCCACAACCAAGAGGUGUACAGUCUCAGGGA
Csu-novel-147	CUAGGUGUGAGGGUCACAGCGA	22	361	-41.9	scaffold64.len2663924-:768767-768833	UUCACAAGUAUCAAAUCCGACUGCUGUGACUCUCAUACUUAAUAUGUGACAUGAUACUAGGUGUGAGGGUCACAGCGAAUUGUGUUUGAUCACUACAUCAGUU
Csu-novel-148	UAGAUAAACUUCAUCGUCGCUAAUGUC	27	26	-42.3	scaffold7406.len3171+:364-400	GCCCCCAUAAGAUUGGAAACAAUAGAUAAACUUCAUCGUCGCUAAUGUCACUCAUUUACAUUAGCGACGAUGAAGUUUAUCUAACGCCAACUGA
Csu-novel-149	GUCAUUCGGAUUGGACGGCAG	21	2	-43.1	scaffold410.len287738+:254366-254475	CAGUCACUCUCGCUUGCGACGUGUCAUUCGGAUUGGACGGCAGGCUGCCCUUAUCAGUCGUUAUGGUGAGUGAUAGGGAGGGACUGUCGUUCGUUUUACGGGUGGCUGUG
Csu-novel-15	UUGCAUAUCGGGGCGCGUGGGCGGCG	26	6	-29.1	scaffold146.len1585071-:1362293-1362359	UUGCAUAUCGGGGCGCGUGGGCGGCGGCGUCCUUCCGCGGCGAGCGCCGAUCGUCUAAUGUGCGUGC
Csu-novel-150	UACAGUGUAGUCUAAGCAGGUU	22	4	-43.7	scaffold1774.len30472+:3502-3596	UCAGAAAACAAGCGCGAGGAAUAUACAGUGUAGUCUAAGCAGGUUGCCUGCUGCCACUAUGGCCACCCUGCUUUAACUACAUUGUUUAUUUCUCGUUACGCCCGCCGCAU
Csu-novel-151	UGUGUCUGUGUCGGUAAAGCAGUUUCG	27	2	-43.7	scaffold66.len2634640-:226592-226699	NNUGUUGCUUCGGGGGUAGACACGAAACUUUUUUUUGCCGUCUGGACGUAGCUUACCAACUGUGUCUGUGUCGGUAAAGCAGUUUCGUGUUGUUUUUCUUGGGCAGCGGG
Csu-novel-152	UUAGUGUUCUGUCGGUGGUCCAAGGCA	27	4	-43.9	scaffold37.len3578051+:1307046-1307155	CAAUCUGUUUUGUUGGUUCUAAUUUAGUGUUCUGUCGGUGGUCCAAGGCAAUAACACCCCUAGAGCUGCUAUUGCCCGGACCAUCGACAGAACGUUUGGUUGUUCCACCG
Csu-novel-153	CUGGGCGGGCUGGGCAACGGGUU	23	7	-44	scaffold82.len2475306-:2184912-2185020	GCAGGUGCCGGUGCGGUGCGUGCUGGGCGGGCUGGGCAACGGGUUCAAGGUGGCGAUGAACAUCCUCAACAACGGACGCUUCGGUAUGGCGGCCGCGCUCUCCGGCACG
Csu-novel-154	UAGUGCAUUAAGUUGGGUUUUUGUU	25	3	-36.2	scaffold1792.len29871-:11501-11610	GCGCACGCUUUAUUUGCGUCGAUAGUGCAUUAAGUUGGGUUUUUGUUGUGGGGCAGCGCGUGAGCUGCCAGAGCCGCUGCAAUCUGCGCUUUUGUGCAAUCAGUGCUUUC
Csu-novel-155	UCACUGGGUGAAAUGAUAGCU	21	63	-44.5	scaffold131.len1692135+:804437-804540	UUGAUUUUGUCUAGCAGUGAUAGUUGUCAUACACCCAGGAGACAUGUUAUCAUUUUGUCACUGGGUGAAAUGAUAGCUGUUACGGUUAAUGACAAAUAUCAUCA
Csu-novel-156	UGGUUGAGCAGCUGCAGGACUGGCC	25	4	-44.5	scaffold183.len1185789+:679809-679918	UGCAGCCGGCCUCCAGCAGCGCUCCCACAUCCCAAUGGGUUCGCAAACACCCGGCGAUAGUGGUUGAGCAGCUGCAGGACUGGCCGAAGCACAUGCGCGCCCUACAUAAG
Csu-novel-157	UUCAGGUACUCUCCUGUGUAACGC	24	57	-44.7	scaffold61.len2763490+:2692788-2692914	ACAAGCUCCUCAGUUUCGUCGGUUCAGGUACUCUCCUGUGUAACGCCGGGUAGUUGGUAAUCCCGGGAGUCGCAUUAUGGAAACCGCUGGCGACUGCAGGCUGCAGGAACGGGUAGCUGAGCCUGUA
Csu-novel-158	UACCUUGGUGCGUAGAUGUAAGCGGCU	27	5	-44.8	scaffold24.len4360977+:3066169-3066263	CUAUCAGCGCGUACCAGGCGGGCGACGCGUACGUUAGUAGAGGGCGGAUAUACAUUUUGUAAAUGUCUACCUUGGUGCGUAGAUGUAAGCGGCUGUGUGGUAUGUUGGGUGAUAGC
Csu-novel-159	CUCGGUGUGAGGGUCACAGCGU	22	114	-44.9	scaffold64.len2663924-:769337-769434	AAUCGAACUCGGCAGCUGUGACUCUCACACUUAAUGUGAUGACCACUACCCACUCGGUGUGAGGGUCACAGCGUGUCGCGUUUGUAUAUACUUCUCAU
Csu-novel-16	GCCUCCAUAGCUCAGGGGUUAG	22	35	-32.5	scaffold443.len222075-:173808-173881	GCCUCCAUAGCUCAGGGGUUAGAGCGCCAGUUUAGUAAACUGGAGGUCUCGCGUUCGAUUCGCGAUGGAGGCAU
Csu-novel-160	UGAUCCGUUAACCAAGAUAGCUGCCAGCCU	30	6	-45.5	scaffold149.len1531531-:1135702-1135811	CCGCCGUCAGGAAUGGUGCGCAACAGGCUGGCAGCAUUAUCACGUUGAAUGGCAAGGCUGAUCCGUUAACCAAGAUAGCUGCCAGCCUUUUGGUCACCAUUCACUUCAGU
Csu-novel-161	UAUCGUGCUUGGAUCAGAGGUCGCGCU	27	4	-45.8	scaffold6858.len3658-:2311-2420	CACACGUAACCUCUGGUUCAAUCACGACUGUGCUGAAGCUGCUUCGCGUAAGCAAGCGGCAUAUCGUGCUUGGAUCAGAGGUCGCGCUCUUAAGGAUCCCGAGGUCGAUU
Csu-novel-162	GCGGGUGGGCGAGAGGAGGGG	21	2	-45.9	scaffold266.len750823+:681249-681358	GUGAGGUGGUGAGGGGCAUCGUCAGGUUUUUAGUGGGUACAGCCCCCUUCUUCUUCGGAUUGGCUGAGCGGGUGGGCGAGAGGAGGGGACGAGUCCCACAUAACUUCGCC
Csu-novel-163	UGUUGUCUGCUCGGCGGCCAGAAGG	25	3	-46.2	scaffold791.len68283+:32977-33079	UGAGCGGCAGCGGGCCUCUCAGUGUCGGGGGGGCGGGGGGGCUCUAUAGCGCGUGUUGUCUGCUCGGCGGCCAGAAGGGCCGCGAGGUCGCGUGUAAUUUUAU
Csu-novel-164	UAAAAGUAGUUCAAAAUGGCAU	22	6	-46.3	scaffold64.len2663924-:595417-595451	CUUCUAAAAGUAGUUCAAAAUGGCAUUAUACCUAUAUGCCAUUUUGAACUACUUUUAGAAGGACUAAUAGAUACCUACCUAUAUUUAUUAGU
Csu-novel-165	UGAGAGCGGGACAUGACCUAAU	22	5	-46.6	scaffold5.len9039658-:4894552-4894661	CAUGGCCCGAGGGUUCAUCGGUUCAUUCCUAGAUUCGGUCAUGUCACGUUCUCAUAAUACCUACUAUGAGAGCGGGACAUGACCUAAUUUAAGAAUGAAGUUUCAUUGGU
Csu-novel-166	UCAUAAGAAUCAUCACUGCUAUAUCCAU	28	3	-48.5	scaffold152.len1513173+:522276-522312	UAUAUACCUGGUUCAUCGGAAAUCAUAAGAAUCAUCACUGCUAUAUCCAUCGGGAUAUAGCAGUGAUGAUUCUUAUGAUUCUACGAUAA
Csu-novel-167	GGGAUUGGCGUGCAUGGAAGGU	22	1	-48.6	scaffold19.len4725394+:149106-149213	GAGGCUCAUGAGCAGUGCGCGGUGGGAUUGGCGUGCAUGGAAGGUCGCUGUGCAGACCCAUGCGCACGGGGUGGACCAUGUACACCUGGUCAGCACUGCGCAGUUAUCAG
Csu-novel-168	UGUAGUGCCUAGGAUGAGCUG	21	5	-49	scaffold61.len2763490-:450475-450584	AAACGGGGAAAAAUAUGUCUGUUCGCCUCUGGCAUAUCCUGGGUACUGCCAGCUUAGAAGUGUUGCUGUAGUGCCUAGGAUGAGCUGGAGGAGGCUUGACGCGUCCAUGA
Csu-novel-169	UGUCGUAUCUGGUGGUGGCAGGAGCUCC	28	7	-49.1	scaffold2651.len15859+:11152-11261	GGCGCGUGCGGGAGCCCGAUGGUGUCGUAUCUGGUGGUGGCAGGAGCUCCCUGGGGAGUGGUCUGUUGCGGCGGGUAUGGGAGCGGUCGUACGCGGGCGCGAUGUCUCGC
Csu-novel-17	UGGAAGAUGGGUCGGGUGCU	20	7	-35	scaffold382.len335122-:116652-116739	UUUGAUUCCAUGGAAGAUGGGUCGGGUGCUGGUAUGGGAUGCAACCUGUUCAGAUACGCCCCUUCCCAUCUACAUGGAACUAAC
Csu-novel-170	GUUGGAGGAGUGGGUGGGUCU	21	8	-49.6	scaffold5.len9039658-:5641714-5641823	GGCGAUGGAAUGAGGCACUCUCCCAUUUAAGCGCCGGCCACCGGACGAUUGAGACCAUUUGUCCGGUGUUGGAGGAGUGGGUGGGUCUCGUUCCGCAUGGUGCAGGUACU
Csu-novel-171	UAAAGUUGCGAGAUGGUUGGGAA	23	2	-49.8	scaffold18144.len865-:545-654	CACAUGAAUUAUGCCGGGAAAAUCCAGACGAUACCCAACCAUCUGGCAACCUUAUGUCUGUCACAUAAAGUUGCGAGAUGGUUGGGAAUUGUCGGGAGAUUUCAUCAUUU
Csu-novel-172	CACAGGACUAUAAAUAUUAU	20	2	-50.4	scaffold21634.len691+:155-240	AACGGAAAUGCGUCACGAGCAUCACAGGACUAUAAAUAUUAUGUGUUCCUAAACACAUAUAUUUAUAGUCCUGUGAUGCUCGUCUC
Csu-novel-173	UAAGUUUUUGUUCUCUCUCUCAACGGA	27	4	-50.4	scaffold232.len900487-:876115-876208	UUGCAAUAAGUUUUUGUUCUCUCUCUCAACGGAGUACAGUACUCCGUUGAGAGAGAGAACAAAAACUAAUGCGCAAAGCAUAUCUUCUCAUUAC
Csu-novel-174	UGAAUAGAUCGUUACUUGAC	20	6	-50.4	scaffold1.len11383612+:2094085-2094194	CUACGACUGUCCUAAACCGAUGCCGCGCCGCAGGUCACUUAACGAUCUAUUAAUCUAGGAUCUAGAUGAAUAGAUCGUUACUUGACCUGCGGUGGUCUAGACUCUAGAUG
Csu-novel-175	UAAGGGAAUUUUCUUUAUGGACCU	24	3	-51	scaffold1.len11383612+:1476752-1476841	AAUAAGGGAAUUUUCUUUAUGGACCUAUAUUAUCCUAAUAAUAGGAUAAUAUAGGUCCAUAAAGAAAUUUCCCUUGAUAUCAUGUAUAAA
Csu-novel-176	UAAAUUCGUGAACAUCGAACGUU	23	26	-51.5	scaffold143.len1607457+:1469933-1470032	GAGACAGACGGUGCGCGCGGUCCGUUUGAUGUCGCGGGUUCAGCGCUGUGUAGGCUAAAUUCGUGAACAUCGAACGUUCCGCGCGCACAACACUCCACUC
Csu-novel-177	UCGAGACCCCGAACAAGUACCAUAGCCA	28	3	-51.6	scaffold254.len800378-:715300-715414	GUGCCUCAUGAAUAGUCAGGGUUCGAGACCCCGAACAAGUACCAUAGCCACGGCCGAUCAGCUUUUCUUUUUCGGCCUGGUGUUCGGCUUGUUCGGUAUCUCGACCCCCGAGUAU
Csu-novel-178	CGUUAAAAUGGUGAUGUUCCUC	22	25	-51.8	scaffold103.len2108851+:807475-807584	AAAAUUACAGGCGUAUGUAUCAGGGUUAUGAGGAGCAUCAUCACUAUAAUGGUUUUGUUGGAUACCGUUAAAAUGGUGAUGUUCCUCAGAAUCCUGAUAGAGUCUGCUUA
Csu-novel-179	ACAUUAACUGUCAGGCUACU	20	4	-52	scaffold77.len2536142-:2496586-2496695	UAAAGCGAUAUAUCGACAUUCAACAUUAACUGUCAGGCUACUAUGGAGUUUGACAGUAGUCUGACAGUUAAUGUCGAUAUAUCGCUUUAUCAUAUCCCGUUUCGGUGGUC
Csu-novel-18	UGCAAGACCAGAGCGAGAACCAAGCAUA	28	14	-18.9	scaffold3874.len9890+:7957-8064	AGUGCGUCGUAAUUGCGGAAGGAUUUUUGGUUUUUACCAAUGCUGCAAGACCAGAGCGAGAACCAAGCAUAGCAGGAGCACCGUCAGUACAAAACCCGGCAAGCCUUU
Csu-novel-180	UCCAUCGGGGGUCUAGGGUCAGG	23	1	-39.5	scaffold103.len2108851-:198648-198754	GAGCCUGAAGUGCUCCUCCCAGCUCCAUCGGGGGUCUAGGGUCAGGCCGAGAUACCUAUGAUGCAUCUCGACCGGAGCCCACACCCCCUCUACCCGGGCACGGAGCU
Csu-novel-181	UGAGUCGGUACUCAUCGCCAUCC	23	6	-53.7	scaffold101.len2134213+:1186802-1186911	GAGGGCGUAUGAGUACCAACUCAGAUCCGGCUGUGCCUUUUCCAAAUCGGAUAGGUACGCUUGGAUGAGUCGGUACUCAUCGCCAUCCGCGGGGGAAAACGCACUCCCAU
Csu-novel-182	ACACGAUCAGUUUGGCGUCAGUUCAGUC	28	6	-54	scaffold34.len3691886+:3454221-3454330	CUUCUCCUGUUAGAGGUGGGUUACACGAUCAGUUUGGCGUCAGUUCAGUCCAUCAGUCUGGUAAGACUGACGCCAGACUGAUCGUGUAAUGCGUUUAUGUCCGUCAUCAC
Csu-novel-183	CACCAGGAUGUAGAAACCCCGGGGGCA	27	25	-54.8	scaffold3464.len11372+:2001-2029	GGACACGUGGGGAGCCGGCUCGUCACCAGGAUGUAGAAACCCCGGGGGCAGGGGCCCGCGGCCUCAUAUCCCCUGUAGGGGGCAUGGCGUCUCUGGAAGUGCCGCCCCAC
Csu-novel-184	UUAAAUGCAUUUAUGAGGGCUCCGGCA	27	3	-56.4	scaffold114.len1870392+:89360-89453	GUGAGCAUGCUCAUUGUCCGUCAGAUCCGGAGCCCUCAUAAAUGCAUUUAAGCAGCGGCUUAAAUGCAUUUAUGAGGGCUCCGGCAAUGCGAAA
Csu-novel-185	UCGCUCUGACUUCGUGGUCU	20	30	-56.7	scaffold6.len7712196+:1634218-1634315	GGAUUCAUCCACAAACAAACGGUCGCUCUGACUUCGUGGUCUCUUUUACCAAUAAGAGACCACGAAGUCAGAGAGGCCGUUCGUUUGGAACAUCAUAC
Csu-novel-186	UACUCUAGCGCGGCAGAAUAAAAUAA	26	2	-58.1	scaffold352.len449016-:313293-313334	CAAUCUAUGCGGGGAUUCGAUUUACUCUAGCGCGGCAGAAUAAAAUAAGGGGUGUCCCCUUAUGUUAUUCUGCCGCGCUAAGAGUUAAUCCACCUUGCACCUUAUGAUGU
Csu-novel-187	AGGCGAUUGGGAGUCUUAAGGUG	23	1	-61.5	scaffold11.len6090138-:4254339-4254448	AGCUUCAUUAUGCCCUUUUUAUAGGCGAUUGGGAGUCUUAAGGUGUGACUUUAAGACUCCCAAUCGCCUAUCAAAAGGGCAUCAAAAAACGUCCGAGUGGCGUUCUAUUA
Csu-novel-188	GAACCCGUCGAUCGUCCUUG	20	3	-62	scaffold199.len1125067+:615290-615392	GUGCCUGCUGGAAACUGCCGCAAGGACGAUCGACGUGUUCUAAGGAACUUCCAAUUCCUUAGAACCCGUCGAUCGUCCUUGUGGCACCCUAUCCAGACCCAUC
Csu-novel-189	AGCGUCUACCGCGUCGGAUUUA	22	3	-62	scaffold53.len2961875-:2489830-2489939	CUCGGGUGUGCAGCCCGACGCGUCAAUCCGACGCGGUAGACGCUCAAAUAAAACCACACUUAUUUGAGCGUCUACCGCGUCGGAUUUACUAUCGUUCGUCGUAUCGAAUU
Csu-novel-19	UCCAUAACACGUUGGAAUGUCGACGGAG	28	11	-19.4	scaffold687.len82148-:47455-47565	AUCAAGCCCACGCAAUAAAGAGUCCAUAACACGUUGGAAUGUCGACGGAGCGUUCUUUAAUCCGAACGGCAUUCGAAGAAAUUCAUAAUUUUAAUUACCGCGAUAAUCACA
Csu-novel-190	GAAGAGAAGUUGACUGGUGA	20	2	-66.5	scaffold31.len3930475+:14885-14994	GGAACGUUCUUUCAAUGCAACCAUCCACCAGUAAAGAUCACCAGUCAACUCCUCUUCAAACUGGCUUUGAAGAGAAGUUGACUGGUGAUCUUGACUGGUGGAUGGUGAAA
Csu-novel-191	UGGUAGAGACAGCUCGAGCAGU	22	23	-66.9	scaffold293.len637396+:485872-486011	GCUUCCUCGUCAGAAUCCAUGACUAGACUGCGGUAGAAAUUCAACUGCUCGAGCGGUUGGUAGAGACAGCUCGAGCAGUCAACAACCGACUGCUCAAGCAGUCAACGCCGACCGUUCGAGCGGUCCGUGUACGUCGGUCA
Csu-novel-192	UGUGAGGUGAGGGCGGUCGGCG	22	1	-70.6	scaffold163.len1355411+:945508-945617	GGAAGGACGAGAACGGGGGCCGUGUGAGGUGAGGGCGGUCGGCGCUUGUAAUUUUGAGAAGAAUGUGCCGCCGCCCGCACCUCUCACGGUCCCCGUAUUGGCGCUCCACC
Csu-novel-193	UUCAUCACGUCGGGGUCACCA	21	871	-72	scaffold4125.len9194+:8019-8080	CCUUUACCAUCUCCGAUCUUAACUUCAUCACGUCGGGGUCACCAAUGUGGUGAUUACCAUGUGAUGAAGUUAAGAUCGGAGAUGGUAAAGGACAGAACUCUGAGUAAGAA
Csu-novel-194	CGAUACAUCGGCAUUAACUG	20	1	-75.3	scaffold8.len6480627-:1820076-1820185	ACCGAAAUGGGAUAUGAUAAGGCGAUACAUCGGCAUUAACUGUCAGACUAUUGUCAAACUCGACUGUAGUCUGACAGUUAAUGCCGAUAUAUUGCUUUAUCAUAUCCCGU
Csu-novel-195	AUCUGUAGGAUAGGCUUUUGCC	22	1	-79.1	scaffold176.len1264230+:1043006-1043066	AUUAAUGCAUUCUCCCUAUUCCAUCUGUAGGAUAGGCUUUUGCCCCACUGCAGGGGCAAAGGCCUAUCCUACAGAUGGAAUAGGGAGAAUGGGCCGUGACCCAUGUAAGC
Csu-novel-196	UAAGGAUUUAAGAGAUAGGUAA	22	1	-80	scaffold124.len1734330+:598010-598119	CAGUAACACAACGAAACUCACUAGUUGGUUACCUAUCUCUUAAAUCCUUAGACAGGGUUUGGUGUCUAAGGAUUUAAGAGAUAGGUAACCAACUAGUGAGUUUCGUCGUG
Csu-novel-239	UUAGAUAUGACCAGACGCUUGCACUCUA	28	8	-45.5	scaffold1071.len47812-:2761-2898	ACCUGCUGAACAACGAUGGUUACCAUCUUACCAAUGUUUUUUAGAUAUGACCAGACGCUUGCACUCUACUGGUUCAUUUCACCGUUCUCCUGGUAGUGGACGUCCCACUUCUGUAGAUCCCAGGCAGGUCGAGGAGGU
Csu-novel-2	UUAUGCAAUUUAGAUUGGUGAAUCGCGU	28	35	-19.3	scaffold20378.len745-:643-722	UUAUGCAAUUUAGAUUGGUGAAUCGCGUAGAGUAAAGAGACAUUCUCAAUUACUCAUGUCAUCAAACAGAAUGUAUGCUU
Csu-novel-20	UAAUAGGAUUUGAAGAAGUAGUCGGUAU	28	154	-19.5	scaffold355.len428139-:114579-114675	UAACAUUUUGUUCAUUUGGGCCUCGACUUCUUGUUUGUGUAUUUCUGGGAAUCGAUAUGAUUCGUAUUAAUAGGAUUUGAAGAAGUAGUCGGUAUUU
Csu-novel-21	UCAAGGACUGUGUAGUUAGAAGGCAACA	28	180	-19.6	scaffold254.len800378-:752303-752411	UCAUCAUUAUAAUUGUGUUGGUACUUUAGUAGCUCGCAGUUACCAAGAUUUCUCUUUUUUCCUUCCUCUAAAAAUUUUUCAAGGACUGUGUAGUUAGAAGGCAACAUAG
Csu-novel-211	UGCUGGUGUAGUGCGGCAGUGUGCU	25	3	-32.8	scaffold285.len652953+:400592-400677	NNGUUCACCCGUGGCAAUGCGAGCUUGGUCUGCCUGCACGUCUCCAGUUCAAGCCAGUGUUGCUGGUGUAGUGCGGCAGUGUGCUCGC
Csu-novel-22	UCCUUGAGCAAUAGAUCGCCGGAAGUCU	28	12	-21.1	scaffold304.len601972+:133686-133778	CAACGUCUUUCUUAGUCAUCAGUCCUUGAGCAAUAGAUCGCCGGAAGUCUUUUACUGUGGUUUUUUCAAGUAGCAGGGUGUGGAUGACAAAGG
Csu-novel-23	UGAUCUCUGUGAAUGUCCUUCCUGAAGCA	29	14	-21.3	scaffold35.len3613038+:2634209-2634315	ACCAGUCUCUUGGUAGCGUUCCCCACAGGUUAAGGAUAGCGCGUCGUGACACACCAACUCGUAUUGCCAGUGAUCUCUGUGAAUGUCCUUCCUGAAGCAUAGCCACC
Csu-novel-24	UUUGACAACAUUGCUGUAGGUCAG	24	8	-22	scaffold1245.len41824-:32378-32491	AAAGGGUGGAGUCAAAGAAAACUCCAAGAUUUUUGACAACAUUGCUGUAGGUCAGUGGAAUAGAGCUGAGAUAAAGAGGAGGCAGAAGUGAAGGAUCCAGCUUAAUAGAUUGUU
Csu-novel-242	UUAUACUUUUCCAGUUCUCGGCAUAAUA	28	11	-33	scaffold262.len773476-:700503-700612	ACAUAGUUUUGAUAUUCUUAAAUUAUACUUUUCCAGUUCUCGGCAUAAUAAUACAUUAUGCCGAGAAGAAGAGAGUAUGCAUGGCUGUGUAAUUCUCUCUCUGAAGGUAU
Csu-novel-25	UACGAAUGUUUUAUUGACCGUCGGAU	26	323	-22.8	scaffold165.len1346237+:1214138-1214245	AUGGAACUUCAACCUUAGUCCCAUCUUUUUGAGUUCUAGUUACGAAUGUUUUAUUGACCGUCGGAUGGAAUGCAUUAGACAAAAAUAAAACCUCCUUCGUAUCUUGCC
Csu-novel-254	UUGUAUUUCAAAGCAAGUUGUUGGUG	26	9	-23.3	scaffold17.len4986324+:881013-881137	AUAUAAUGUGGCAUGGCUAUUUUCAAGAACCUGUUCUGAAGCAUACAUAUAGUAAGGAACCUCAGAUGCUAAAAGAUUGUAUUUCAAAGCAAGUUGUUGGUGUAUUAUUCUGGCCACUUGGUUAU
Csu-novel-257	UUUGAAUUUGGGCUGGCACCGGU	23	7	-34.9	scaffold100.len2178692+:156259-156378	AUCAUCCACGUCUAUGCUGUUAUCAAGGUACUCGAAGCGGUUCUGAAGCUCGAGCUGAAAGCGCUCGGGGUUUUGAAUUUGGGCUGGCACCGGUCGCAGCGUUGAUUUUAUCAGUCGCAA
Csu-novel-26	UCACUGUAGUCUGCUGUAAGGUGGAAG	27	54	-22.8	scaffold371.len368549+:286769-286872	AACAUCACCAAAAAAUGUGUGAUUUCACUGUAGUCUGCUGUAAGGUGGAAGUUACUUUCAGAGAAAGGUGUUCCAAUUAAAGUAGAAAAUUAUGUGUGUCCU
Csu-novel-260	UUUUGGAUGACUGGCCCAUGUCGGCGU	27	24	-39.9	scaffold49.len3080523-:2098968-2099087	AUCCCUCCGCACGGGUUUCCACGCACGGCAAACACGCGGGUGGUCAAUUGAAACCAGCGAUCCUGGUUUUUUGGAUGACUGGCCCAUGUCGGCGUGACCACCAACGUCGAUUAUGUUAUG
Csu-novel-27	CCCCUUGUUACAAACCUCACUU	22	33	-23.1	scaffold41.len3543598+:2909769-2909861	UGCCCAUAGUGUGUGUUGUGGCAAAGGAGAUCUGUAUGGUCAUACCAUCCCCUUGUUACAAACCUCACUUUGGUUGGUUGUACUUAUCAUCAC
Csu-novel-28	AUAAGUAGGUUUCGUCUGACUUU	23	1102	-23.2	scaffold19.len4725394-:4308552-4308661	CCUUAUUUGUAAUUGCCCCAAAUAUAAGUAGGUUUCGUCUGACUUUUGUAUUAUUAUUAUCAAAUUCACUCGUGGCCUCCUUAAUUUUGUGGUAUUACCAAAAUUAUAAA
Csu-novel-29	UCUGAGGUUGUAUCGCAGUAGUCUAUGC	28	6	-23.2	scaffold35.len3613038+:3245200-3245309	CAGACAUGGUAUACAUGUUUUAUCUGAGGUUGUAUCGCAGUAGUCUAUGCCUAAAUUUCUUUUUCUUUAAAUAUUUAGAGCAUUAACACAAAUAUGACCGAGACGUCUAU
Csu-novel-3	UGUAAGUUGUUCGGACACAUAAAU	24	5	-19.6	scaffold7416.len3165+:539-621	UUGUAUGAUUUGGAUUUGGCUAGAUCCCGCGCGAGAAAAUGCAGGCGUGAACCUCUAGCUGUAAGUUGUUCGGACACAUAAAU
Csu-novel-31	UAGGAACUCGAUCAAAGCAUCAAGCUGC	28	2971	-23.7	scaffold7638.len2994+:117-206	CUUUAGCUAAAUCUCUAUUAGCCUCUAGGAACUCGAUCAAAGCAUCAAGCUGCUGUUACAGAGGGAUGCGACGAUCGUGACACGCCUGCAG
Csu-novel-32	UCAGUUCUGAUAAACACGUGCGUGCAU	27	12	-23.7	scaffold59.len2819308-:697293-697390	UUUCACAGCGUCAGUUCUGAUAAACACGUGCGUGCAUAUAUUAAGAUCUUUAUUCACAAACAUGAGUUUAUUGGUGUUGUGGUGUGAAUUAGUUGCGG
Csu-novel-33	UAUGGAUAUCAGGAAUCGAUUGG	23	10	-24	scaffold4100.len9244-:8899-8987	UUGUUCGAUCCUUUAGGUUGGAUCGCUCCAAUGAUCAUAACAUCCAAGGUUCUUAUACAGAAACUAUGGAUAUCAGGAAUCGAUUGGGA
Csu-novel-34	UGUCAAAGCGGCGGUGA	17	7	-24.2	scaffold19.len5725394-:5308774-5308830	GGAGACUAUUGACUGUUUCAAACUGGUUUUGGGCACAUUUUUUUUUUAGAAAAGAAAUGGCUAUAUUAUGUAUGUCGCGGAAAUAUUCUUCUAAUUGCUCAUUGGGCUAA
Csu-novel-35	AAAUGAUGAAAGACGAAAAGAAAAG	25	6	-24.6	scaffold82.len2475306+:92637-92745	AACUGAAAAUGGUACAUUUGGCAAAUGAUGAAAGACGAAAAGAAAAGCUCCAUUGCCUUACUUAUGGAAAACAUUAAAUUGCCGAGUGGCAUCAUUUAAGGAAUUUUUGU
Csu-novel-36	UGUAGGAUUUUCAUCACUCAGUGGCAC	27	47	-24.7	scaffold276.len693140+:83696-83808	UUCUUUAAUGAAGCUACUAGCUUGUUGUAGCUCGGGCGGAUUCUUACAAUGCCGUUUCGUUGUUGUAGGAUUUUCAUCACUCAGUGGCACAGGGUCGAGGUUCUCCUGGUUGU
Csu-novel-37	CAAAGGAUAACCGUACAAACU	21	24	-24.9	scaffold314.len577771+:781971-782003	CAUGUUUGAUAGAUUUCACAAAGGAUAACCGUACAAACUCUGCUAAAGUUCGAAAAUACGGUUAUUUUUUGUUGUCUUUAUUGUUGCUGACUGCAAGGACCA
Csu-novel-38	UUUUACAUUUUGCAGGAUUGAAAGACA	27	4	-25.1	scaffold126.len1721533-:634270-634378	GAGUGUCAAAUAAUUUAUAGUCAGAAUGUAAUAUAUAACGCUUUCGUGAGAAUGUAAUGAUUUUACAUUUUGCAGGAUUGAAAGACAGGCGAUUACUUUCGCCCCAUGC
Csu-novel-39	UGGAUAAGGAUGGUGAACUGCGG	23	4	-25.3	scaffold2478.len17290-:4798-4885	UACACCCUACACUGGGAACUGCGUUCAUUGUUUAUCUUCUGCAUAAAUAGUGUAUUGCUGAUAGUGGAUAAGGAUGGUGAACUGCGGA
Csu-novel-4	UGUAUAACUGUAUGCUUUUGUAUCGGA	27	9	-20.7	scaffold146.len1585071-:1363247-1363326	UGUAUAACUGUAUGCUUUUGUAUCGGAGGUUUGGUUUACACUUCUGCUUCGAUAAGCGAUGCGGUGGCCAGUUAGCUCGG
Csu-novel-40	UAGUACGAACUCCAUAAGCGAACAUGU	27	9	-25.5	scaffold3485.len11280-:751-846	AAAUUAUGCAUAGUUUGCUCCACUGGAGUGUCGUAUGUUACCGAUGCUUACAUAAUACCUAGUACGAACUCCAUAAGCGAACAUGUCCUAAGGAGA
Csu-novel-41	AUAAGUAGGUCUCGUCUGACUUU	23	149	-26	scaffold19.len4725394-:4306915-4307024	AAUUAACACAAUUAUUACAAAUAUAAGUAGGUCUCGUCUGACUUUUGUACCAUCAAAGUCAUUCGUGGUCUCCUUAAUUUUGUGGUAAUAUCAUAAUUAUCAUGUGAAUU
Csu-novel-42	UACAGGUUAUGGGGUGGAAUAUCGGUA	27	93	-25.6	scaffold507.len154891+:129439-129511	UUUUGGUAUAAUAACAAAAAAAUUACAGGUUAUGGGGUGGAAUAUCGGUAUAUCGGUAUAAGGUAUACAUGUGACACCCUGCAAGGCCGUAGCA
Csu-novel-43	UAAAACAUCAUGGGUAUAAUCGAUU	25	12	-25.7	scaffold1009.len50577+:43450-43552	UUAUGUCGAAUUUCCCUAAUUUUAAAACAUCAUGGGUAUAAUCGAUUCUGCAACCAAAGGCAGUAUGGAAGUCUGAGCCUAUGAUGCCGUCAUAGGGUAAAUC
Csu-novel-44	UUGGAGGAUAGCAUACAGCUCGGCUU	26	8	-25.8	scaffold92.len2340521+:1073025-1073108	NNNNGGAGAGAGGACCUCGAAUCGCUGAGCACAACGGCCGCCUGCCAUCCGCAUUCCGUGGCUUGGAGGAUAGCAUACAGCUCGGCUU
Csu-novel-45	UCCAGAAAGCGCACGUCACAAUUAUAGU	28	3	-26	scaffold168.len1322901-:707657-707757	CAGUAUUUUGGUCUCCGACGGGCGUAAUGUGAGGCGGCUGGACCCUGCUUUGCCGGCAUUCCAGAAAGCGCACGUCACAAUUAUAGUUUUUACGACUGUCC
Csu-novel-46	UGUUAGUGUACGUUGCCUGUUAGCAGA	27	7	-26.2	scaffold84.len2437568-:2117805-2117906	GAUCCCAGGGUAGGUGUUAGUGUACGUUGCCUGUUAGCAGAUCCAAGUAUUACCGGGGUAAACGGCGUGGACGUACGAGUGACACUUGACGGUAGACGUGAA
Csu-novel-47	UAUUUGGACAAGCUGAAGCUGGUAUUAC	28	4	-26.3	scaffold46.len3245581+:2618245-2618354	UGUCUGCAACUUCUAUAGGUUAUUAUUUGGACAAGCUGAAGCUGGUAUUACGCUAUGGAAACAUGCGUGAUUGUGUGAUAUUAGUUGUUUUUCAGAAUGUCUCUUUUUAC
Csu-novel-48	CAGAAGUUUGCAACACAGGCAA	22	137	-26.4	scaffold3387.len11703+:1966-2057	GCAUAUUUUGUGUGAGAAGCAGCAGAAGUUUGCAACACAGGCAAUAAAUAAAUUUGCGACUGUGUUAUAAACUUUUUUUGUUCCCCGUACAA
Csu-novel-49	UGAUAGUGAUGAUGAAUGGAGCUGUGUA	28	9	-26.5	scaffold161.len1385362-:120847-120939	UCCGCUGAUAGUGAUGAUGAAUGGAGCUGUGUACAAAGUAAUUUAAUCAUCCCUUAAUCAUUUUUAUCAUUCCCUUCAUCAUCGCUAUCUUCA
Csu-novel-5	UGUCUGUUUGUUGCGGCUAAUCU	23	8	-21.6	scaffold314.len577771-:427462-427527	UUCGUCUGUAUGUCUGUUUGUUGCGGCUAAUCUCAGGAACGGCUGGACCGAUUUUGACGAGACUUUCACUGAUAGAUAGCUGAUGAU
Csu-novel-50	GUUUAUAUCCGGCUCGAAGGACCA	24	4	-26.8	scaffold30.len3988525-:1299866-1299961	CGGACAAGAUUGUAGUGUUAUGAGACCCAUUCUCUAGCGCCCAUCCACACGCUUGGUCUAUUGCGUAGAGCUCGGCCUGGAAGACACUGCAAGCCG
Csu-novel-51	UGUUAUAGAUUGGAGAAAAGGUUCGGA	27	4	-38.6	scaffold47.len3168181-:2583540-2583649	UGAUGAGGUUUCCACGGCAGCAAAUCGGUUCUCCAGAUUUGACUGGAACGUUUCAGAUCCUGUUAUAGAUUGGAGAAAAGGUUCGGAGCCUGGAUUUCAUCAAACGGACG
Csu-novel-52	AAACCUCGAAAAUGUGGUUCGGAUUCUC	28	9	-27.3	scaffold125.len1723007+:556683-556786	UAUCUGAAACGUUCCAGUCAAAUCUGGAGAACCGAUUUGAACCACAUCAGACGUAAACCAAAACCUCGAAAAUGUGGUUCGGAUUCUCAGGGAAGAGGGUACGAAACUAU
Csu-novel-53	UGCUUGAUUUCCUUGACGGUGCCAGAA	27	16	-27.4	scaffold37.len3578051-:1283103-1283209	GUGUUGUUCUUAUGUAAUGGACCAUGUUAUGCUUGAUUUCCUUGACGGUGCCAGAAGGUCUGGUAAUAUCGGGGUACUCACGUAAAAGUUGAUGGUAUCGACUAUCAC
Csu-novel-54	UUGCAAUGUGUGCUCGGGGUUGGGAU	26	7	-28	scaffold22.len4589509-:445651-445743	UGGUCUUGCAAUGUGUGCUCGGGGUUGGGAUUUUAUCACCUGUAUAAUGGGUUCCCAAGCCGUUGGUACACACCAACCAUCUUCCCUAUUGAA
Csu-novel-55	UGAUAGGAAAAUGCGUCUGCAGAAUAC	27	6	-28.2	scaffold16.len5173300-:5079460-5079587	AACUGCAUUGCUGCGCUGAAGUUGAACUGUAGGCUUUAAUUUGGGAGUACGGAUAUGGUAAGAAAGAUACACCAAAUCAUGAUAGGAAAAUGCGUCUGCAGAAUACUGGCCGUGCUUAGCAGCCAACG
Csu-novel-56	UGGGGGAUGGGGGAGAGGGUU	21	7	-28.2	scaffold232.len900487+:710423-710532	AUUUUGAAAAAUCCCUAGUGAGAUUGGGGGAUGGGGGAGAGGGUUGUAUGAAAUCUCACGACAUCUCGCCAGGGGCGGAGGGAGUUACAGAAAAAAAAAAAAAAACACCU
Csu-novel-57	UUGGUUAUGUAGUGGGCCGUCACGGCAAU	29	17	-28.2	scaffold355.len428139-:187525-187634	UUGUAUGAUUGCCAGGAAAACUUCUGCAUUCCAAUAAAAUCGAUCUUGAAUCGAAAUAUUUGGUUAUGUAGUGGGCCGUCACGGCAAUGAAACUUUCAUUUAGUGAAGAA
Csu-novel-58	GAGUUCAAAUCUCGGUGGGACCU	23	27	-28.3	scaffold314.len577771-:427962-428077	AAAUUGAACUGUCAACCCUAGUGGUCCCAUGGUAUAAUGGUUAGCACUCUGGACUCUGAAUCCAGCGAUCCGAGUUCAAAUCUCGGUGGGACCUUUGCUUUUUACAUGUAGGUAUG
Csu-novel-59	UGAUGUAGAUAUUAAAAAGGGUA	23	6	-28.4	scaffold223.len959084+:956900-957009	AAGAAUCAAUUUACAGAGGUCAUUGAUGUAGAUAUUAAAAAGGGUAGGACCUAGGACACUCCCCUGCGGAACACCAUAACUGAUAUUUUCAUCCUGACUUGUAAAAUUGU
Csu-novel-6	UGACAUGGUGCAGAAGUUUUGGCAGUUA	28	13	-22.1	scaffold994.len51114+:42684-42752	CCUGUUGAUACUUCUACGUCGUUAUGCGCGCUUUCGCUUAAUGACAUGGUGCAGAAGUUUUGGCAGUUA
Csu-novel-60	UGAUUUCAGCAGCUAGAUCAGGAUC	25	21	-28.4	scaffold76.len2551045-:901198-901309	AUAAACUAUUUAUUAAUGCCAGUGAUUUCAGCAGCUAGAUCAGGAUCGGAGAAGAAUCUUCUAGACGUGUUGCCUGAAUUGGAAUUGCCGAAACCAGCUUCUGGCAUAUCU
Csu-novel-61	AGUUUUGCGUCAAACUAUCCUC	22	2	-29	scaffold36.len3586022-:124391-124490	CAAUCGUUGCAGUCGUUUUAGCAGUUUUGCGUCAAACUAUCCUCUGUAUUUGUUUGCCAGAGGUAGUCUACCGCAAUUCUGUUUUGUCUUCGCUGGUUUA
Csu-novel-62	GCUAAUGAUGCGACUAAGGAUUG	23	2	-28.6	scaffold242.len853985-:59106-59199	GCAACAGCAGGAGCGUUAUCAUAUGGGUUGUGGAGUUUCAGAACUGGACAACAGCGGAAGUCACAGCUAAUGAUGCGACUAAGGAUUGUUGCAC
Csu-novel-63	GACUGUACAUGAUAUUGUUGGAGCCA	26	2	-29.3	scaffold781.len68940+:53514-53603	CCCCCGCUAAAUAUAUCUGGCCGACUGUACAUGAUAUUGUUGGAGCCAUUAUAGGCUUUAAUUUCCGCCAUUCUACGCUCGGCAUGGACAAUCCUAGCACCCUAGCUGGA
Csu-novel-64	UGGAUGACUAGUGACUUAUUCGUGGAG	27	3	-29.3	scaffold29.len3994842-:129546-129655	AAACUUAAUGAUGCACGGUGCACCUCCAGGUAGUUUAGGUCUUGCGAAUCCUUCAGGUUGGAUGACUAGUGACUUAUUCGUGGAGGUAAUGAAACAUUUUAUUAAGUAUU
Csu-novel-65	UUUCGUACAUCGACGCUUGGAAGAGGAU	28	11	-29.3	scaffold288.len645290+:57219-57337	UGGGCCAGUGAGCAAUGCCAUCUUUUCGUACAUCGACGCUUGGAAGAGGAUGACUUGUGCUUUUUUGUUUUUAGCUUGCAAUUCCUUGUCAACAGAGGUAUUGCUUGGGCGUCCUCUUU
Csu-novel-66	UCACAGUGAUAAGGGGGCAGUCUUAA	26	13	-29.7	scaffold9799.len2006-:695-782	UUUAUUAUUGUUUGCGACGUGCCCCUUUACCUGAGCCGAAGCCCAACUGGAGGGGGUUCAAUUCACAGUGAUAAGGGGGCAGUCUUAA
Csu-novel-67	UAAUGUACAUAGGGAUCGUAGUG	23	281	-29.8	scaffold300.len620360+:258424-258530	CGAGUGCGACCGCACUCAGUAUUAUAAUGUACAUAGGGAUCGUAGUGUGGUAUACGCUAUAAUCAAUUUCCGUGUUCAAUCUUAGGGGUUGUUGCAUCGCAAUCCUU
Csu-novel-68	UAGCUGUUCUUAACUGCAAAGGAGGUU	27	4	-29.8	scaffold403.len294354-:22619-22728	AUCAUUGGCAAAUGACCGGCCAUAGCUGUUCUUAACUGCAAAGGAGGUUGAGGUAUAAAUUUCCUUUUGCGCCCGACAGGUUCUUCUGAUGAUUCUAUAGAAUCAUCAAC
Csu-novel-69	AUAAGUAGGUCACGUCUGACU	21	21	-30	scaffold19.len4725394-:4306753-4306862	AAUGAACAUAAUUAUUACAAAUAUAAGUAGGUCACGUCUGACUUUUGUACCAUCAAAGUCUCACGUAGUCUGCUUAAGUUUGUGGUAAUGCAAUAUCACAAAGAAUCGCU
Csu-novel-7	UUCAAGAACAGACUGUGCAGCGUC	24	9	-22.1	scaffold3331.len11931+:6094-6176	UUCAAGAACAGACUGUGCAGCGUCGGACAACUCAAUACUUGACAUAUUGAUUACCGUUCGAGUUGGUAGUGAGUUCUCGUGGU
Csu-novel-70	CCAUUUUGGAAAGUUUUGA	19	3	-30.2	scaffold682.len82387-:65380-65476	CUUGGAUCGCCAUUUUGGAAAGUUUUGAAGUGCUGUAACUUCUGAACUAUUUAGGCUGGGAACGCGGGGUUUUCACCUUUGGGCAACCCCGGACCUA
Csu-novel-71	UAAAGAGCUCGGCUGUACCAUGUGCA	26	4	-30.7	scaffold76.len2551045-:329661-329770	CCUGGCCUCUGCAAGGUGAGCCGGCUCUACUACGCCUAAAGAAGGAUAUAGAAUUUUAUUAAAGAGCUCGGCUGUACCAUGUGCAGAAGACAAAAUAGCGGGAUAUUUCA
Csu-novel-72	UGGUAAAUGUAGUUUCCAAGGAAGGCC	27	23	-31.1	scaffold513.len150011-:23297-23406	GGUAACUAUCGGGUAUGAUUUUUGGUAAAUGUAGUUUCCAAGGAAGGCCGACUUCAUAUCGGCCAUCCUUGAGCUGCCGCGCAGAUGUUUCAAUGAUGUCAAUAGCUCGU
Csu-novel-73	AUAAAGCUGACUCACUAAAUAU	22	243	-31.3	scaffold131.len1692135+:777141-777248	AGAUGUGAUUUCCAACUGGGAUAUUUGGUGACUUGGCUUAUGAGAGUCAAUAUAACAUACAUCAUAAAGCUGACUCACUAAAUAUUCUCGUUAGAACAUAAAUCGUCU
Csu-novel-74	UCACUGGGUUUAAGAUAAC	19	17	-31.3	scaffold131.len1692135+:789385-789493	UGUCAACCUUUCUAUGUCAUUUUACUGUAGUGUCUUAGUCUCAGUAGACAUGUCAUCAUUUUUUGUCACUGGGUUUAAGAUAACUUCAGUAUUUGACAGUUGUUCUCCG
Csu-novel-75	AUAAGUAGGCCCUGUCUGACUUU	23	10	-31.4	scaffold19.len4725394-:4308728-4308829	GCAAUUCAUCUUUAUCACGACUAUAAGUAGGCCCUGUCUGACUUUUGUUCCAUCAAAGUCGAAUAGGUUCUGCUUAGAUUUGUGGUGAAAAUCAACCAGUCC
Csu-novel-76	UAAAGAACAAGACGACUACACUCCUAC	27	3	-31.8	scaffold13.len5442586+:1143896-1144005	GACGUGGUUCAGAAGGGAUGUGGGUCGAUAGUUCUUAAGUAGGGUCUUGUCUCCCCUUUUAAAGAACAAGACGACUACACUCCUACUCCACGCCUCCGGAGUUCUCCCUU
Csu-novel-77	UGCUUUUCUCUCCCUGGCGAUGGUGUC	27	5	-32.3	scaffold15.len5230092-:2596192-2596301	UUUUCCUGUGAGCAGUUGAAGUUGCUUUUCUCUCCCUGGCGAUGGUGUCGAAGCUCCGGCAUAUCGCAGAUUUAAGGUAGAGCCUAGUAGUGUUGGCUUUGUCCACAGUG
Csu-novel-78	CGACCUAGCAGGGUGGUAUGU	21	4	-32.4	scaffold163.len1355411-:309309-309418	AUCACAAAAGAGACAGAUCGACCGACCUAGCAGGGUGGUAUGUGGGCUGCUCAUACCGGACAUCCGAGUGCCCUAUACCAUCGCCAAGACUUCGGUAUCAAAAUCUUGAU
Csu-novel-79	UGUUUGUUAACUUUGAUGGAGCAAGC	26	2	-32.6	scaffold850.len62369+:7382-7502	GGAGUUGUGCUUGUUUGCUGGAUUUGUUCAUCUUUAUGAAGUGUGACCUUUUCUAUCGGUCCCAGAAACGGUUUGUUUGUUAACUUUGAUGGAGCAAGCGCCAGUGGAUUCACAGCUGUUC
Csu-novel-8	UCACUCUUGACAGAGCGGUCGUGG	24	3	-22.4	scaffold30.len3988525-:5957886-5957936	CAUUGUCGUAUCACUCUUGACAGAGCGGUCGUGGUAGUCAUUCAGUAUCAUUGCUGUGGGCAAGAUUGACCGACCAAG
Csu-novel-80	AGUAUCUCAUCUUCAGUAGACA	22	11	-37.8	scaffold131.len1692135+:789647-789752	ACAACGGGCUUGUUAUUUGCGGUAGUAUCUCAUCUUCAGUAGACAUUUCUUGUCAUUUUGUCACUGGUAAUGAGAUUACUAUUGUAAAUGACAUCUCAUCACCAC
Csu-novel-83	UGGAAUUUCUGAGGUGAUUGUAUUAAUA	28	17	-33.2	scaffold49.len3080523-:347297-347406	UGCCGUCGGUAAAGAUGAAAAAUGGAAUUUCUGAGGUGAUUGUAUUAAUAUCUUUUGGUUAGUUGCUUCGUGGAAUUCUAUACCGCAUCUGUUAGAGGGGUGAGGGAGUU
Csu-novel-84	CUGCACUGUAGAUCAGUGACCAGG	24	1	-33.4	scaffold104.len2085646-:1932327-1932421	GGGGAAGGCAAUACUACAGCUACUGCACUGUAGAUCAGUGACCAGGUUUAUGCUUGGAUCACUUUUGCAGCAGUGCUAUAGUCAAGCAUUGUACC
Csu-novel-85	ACAGUCUACCCGGACAGGCCG	21	50	-33.5	scaffold377.len352532-:138156-138252	UCGGGCACGUGAAAUGCUCCGAACAGUCUACCCGGACAGGCCGUUUCCCAUAUCGCCCUGCACGGUGAGGCCGCUCGGAUCGUUGUCAGUUUUCGAC
Csu-novel-86	GUUGCUGUAGAACCGGUGGGGAUCGCUA	28	1	-33.5	scaffold90.len2353873+:1290797-1290914	GCUGGUCGGGAACAGAAUUGAUGUUGCUGUAGAACCGGUGGGGAUCGCUAGAGGCCUGGAUGUGGUCGCUUGCAAGAUCGACAACGGUGUGAAGAGCAAUAGGUGAGUCAAAGUUACA
Csu-novel-87	ACGACAUAGAAAGAGAUGACG	21	1	-33.9	scaffold169.len1313976+:795-900	AUACGAUGCAUUAUCGCACGCGGCAUCUCUUUUUUAUUGUCGUCGCUUACAUCUAUAUAUACUACGACAUAGAAAGAGAUGACGCGAAGAUAAUGAUGAACGACGA
Csu-novel-88	CAUGUGUAUGCCGUGAUGAG	20	1	-34	scaffold62.len2689551+:1139484-1139593	CAUCCCCUGUCAACGACCAUGUGUAUGCCGUGAUGAGGAGUCUGAUGUUGGUGCAGACAGGGCCGGUGUUCACUGGCGUGCAUGUGCUGGACCCGGCUGAGGAAUUCAAA
Csu-novel-89	AUUGAACUCAACCAAGCUCUUG	22	5	-35.9	scaffold95.len2267344+:857448-857557	CGCAGACCUGGGUUUUCUUAGCAUUGAACUCAACCAAGCUCUUGGUACUCCAUUCAGAAAUGUGGUUCAAAGCCUGAUUGAGUUCAAUGACAAGAUUCUCCCGUUUUUCC
Csu-novel-9	UGGUUAUGUGGGGCUCCUCGGCCAAGA	27	16	-23.6	scaffold4973.len6888-:6564-6623	UGGUUAUGUGGGGCUCCUCGGCCAAGAUGGUAAGGGCCGAGACUACCCACUAAAACUUCC
Csu-novel-90	CUUUGCCGAAGGUUCUGAAGUG	22	409	-34.1	scaffold212.len1029124+:572918-573018	CAAGAUGUAAAGUAAUUGGUAGCCUCAGAAUUUUCGGCAAACGAUUGCCCAGGUUCCUUUGCCGAAGGUUCUGAAGUGAUCAGUGCAAAGAAUCCUCGCGA
Csu-novel-91	UACUUUCUUAUUUCCGUUGGGCGCCA	26	70	-34.2	scaffold463.len199071+:109442-109544	CUCGCGUUACUACAAACUUUGGUACUUUCUUAUUUCCGUUGGGCGCCAGAUUGUGAGAGGUCUUGCUCGGCUGGGGCGGGCGGAGGAGGAAAGAAGAAGAAGU
Csu-novel-92	UAGAUUGGAGCUCCAGGCAGCGUUAAUU	28	2	-34.2	scaffold80.len2518448+:2278119-2278210	AAGUUAGCGUUGAUUGGAGGCAAGGCUAGGCUCGCGCCCCUGAGAUCAGCAACUGCGCCUAGAUUGGAGCUCCAGGCAGCGUUAAUUGCCGC
Csu-novel-93	UCCCCGGUUUUGGUAUCAUAAUAA	24	1	-34.3	scaffold2651.len15859+:6323-6423	GACAGCGUGGAGAGCAGAGUUAUUGGUCUAUAGCUCUCUGGGUGAGAUCGAUUUUUCCCCGGUUUUGGUAUCAUAAUAACUCUGCCCUCUUUCCAGAUACU
Csu-novel-94	AAAGAAGACUGUUGUCAAAUUU	22	8	-34.4	scaffold1.len11383612-:9863039-9863148	GUAUUGCCGGCAUUUUGCUAUUGGUAUACUUGACAUCAGUCUCCUUUUCAUUCCAUUUAAAUGAUAAAGAAGACUGUUGUCAAAUUUACAAAUAGCAAAAACGAAUAGCC
Csu-novel-95	CGUUGCAGUUGGCUAUGGAAGAC	23	1	-34.4	scaffold98.len2198007-:1689862-1689969	GGUCUACGAAACCCGGCAUAGGCGACCAAAGCCGGGUGGACAACUUGAGAGGUUACUUGUUCGCGUUGCAGUUGGCUAUGGAAGACGGCGCCGAUGUCAUAGGGUAUA
Csu-novel-96	UCCACUGUGGACCGGUUGCGCCUGAA	26	5	-34.4	scaffold593.len105349-:85496-85605	CAAUAACAGCCUCACCCCGCGCAGUGGCCGCCUCGAUCCACCCCUUUAAAAGGGUCACCGCCUCCACUGUGGACCGGUUGCGCCUGAACCUGAACUGGCAUUCGGCCAGG
Csu-novel-97	UUCGGGUACGGCCACAGCGAUC	22	95	-34.5	scaffold314.len577771+:197871-197962	GUUUUAAGCAUCGCAAGUUCAGGUUCAGGUUGAGGUUGAGGCAAGGGCUCGAGGGGCGAAGGCUCCGGUUCGGGUACGGCCACAGCGAUCGUGGUUGUGGGCACAAAUUCG
Csu-novel-98	UAAUUCGGACAUUUUGCGAU	20	34	-34.8	scaffold58.len2825628+:1051919-1052028	UGCUUCACUACUAACUAACAACCCGGUCAUUUUGCAACAUGACCGAUUUGCGUUGUUCGCUUUUGUAAUUCGGACAUUUUGCGAUGUGGCCGGCUUGGAAUCACCGCAUU
Csu-novel-99	AUGGGAGGACGAGAGGGCGGAG	22	8	-35	scaffold15.len5230092-:2342752-2342861	GAGGGAAUCGGAGGGACUUACGAUGGGAGGACGAGAGGGCGGAGGUUUCAUAAGCUAGAGGCUUUGACUGCUAAGGCCUUCGGAUGGCUCUCCAGUUGUACCCAUGCGCA
